1 **High performance machine learning models can fully automate labeling of camera trap images**  
2 **for ecological analyses**

3

4 Robin Whytock<sup>1,2\*†</sup>, Jędrzej Świeżewski<sup>3†</sup>, Joeri A. Zwerts<sup>4</sup>, Tadeusz Bara-Słupski<sup>4</sup>, Aurélie Flore  
5 Koumba Pambo<sup>2</sup>, Marek Rogala<sup>3</sup>, Laila Bahaa-el-din<sup>5</sup>, Kelly Boekee<sup>6,7</sup>, Stephanie Brittain<sup>8,9</sup>, Anabelle  
6 W. Cardoso<sup>10</sup>, Philipp Henschel<sup>11,12</sup>, David Lehmann<sup>2,1</sup>, Brice Momboua<sup>2</sup>, Cisquet Kiebou Opepa<sup>13</sup>,  
7 Christopher Orbell<sup>11,1</sup>, Ross T. Pitman<sup>11</sup>, Hugh S. Robinson<sup>11,14</sup>, Katharine A. Abernethy<sup>1,12</sup>

8 † These authors contributed equally to the manuscript.

9 **\*Corresponding author:** Robin C. Whytock, [robbie.whytock1@stir.ac.uk](mailto:robbie.whytock1@stir.ac.uk)

10

11 <sup>1</sup> Faculty of Natural Sciences, University of Stirling, FK9 4LA, UK

12 <sup>2</sup> Agence Nationale des Parcs Nationaux, Libreville, Gabon

13 <sup>3</sup> Appsilon AI for Good, Warsaw, Poland

14 <sup>4</sup> Utrecht University, Heidelberglaan 8, 3584 CS Utrecht, The Netherlands

15 <sup>5</sup> School of Life Sciences, University of KwaZulu-Natal, South Africa

16 <sup>6</sup> Program for the Sustainable Management of Natural Resources, South West Region, Buea, Cameroon

17 <sup>7</sup> Center for Tropical Forest Science, Smithsonian Tropical Research Institute, Balboa, Ancon,  
18 Republic of Panama

19 <sup>8</sup> The Interdisciplinary Centre for Conservation Science, Department of Zoology, University of Oxford,  
20 11a Mansfield Road, Oxford, OX1 3SZ

21 <sup>9</sup> The Institute of Zoology, Zoological Society of London, Outer Circle, London NW1 4RY

22 <sup>10</sup> Yale University, New Haven, CT 06520, USA

23 <sup>11</sup> Panthera, 8 West 40th Street, 18th Floor, New York, NY 10018, USA

24 <sup>12</sup> Institut de Recherche en Ecologie Tropicale, CENAREST, BP 842 Libreville, Gabon

25 <sup>13</sup> Wildlife Conservation Society, Republic of the Congo

26 <sup>14</sup> Wildlife Biology Program, W.A. Franke College of Forestry and Conservation, University of  
27 Montana, Natural Sciences Room 205, Missoula, Montana, 59812, USA

28

29 **ORCID IDs**

30

31 **Robin C. Whytock:** 0000-0002-0127-6071

32 **Jędrzej Świeżewski:** not available

33 **Joeri A. Zwerts:** 0000-0003-3841-6389

34 **Tadeusz Bara-Słupski:** not available

35 **Aurélie Flore Koumba Pambo:** not available

36 **Marek Rogala:** 0000-0002-9949-4551

37 **Laila Bahaa-el-din:** not available

38 **Kelly Boekee:** 0000-0001-8131-5204

39 **Stephanie Brittain:** 0000-0002-7865-0391

40 **Anabelle W. Cardoso:** 0000-0002-4327-7259

41 **Philipp Henschel:** not available

42 **David Lehmann:** 0000-0002-4529-8117

43 **Brice Momboua:** not available

44 **Cisquet Kiebou Opepa:** not available

45 **Christopher Orbell:** not available

46 **Ross. T. Pitman:** 0000-0002-3574-0063

47 **Hugh S. Robinson:** not available

48 **Katharine A. Abernethy:** 0000-0002-0393-9342

49

50 **Classification:** Ecology, Computer Sciences

51 **Keywords:** artificial intelligence, birds, biodiversity, Central Africa, mammals

52 **Author contributions:** R.C.W, J.S., M.R., A.F.K.P., P.H., C.O., R.P., H.R., K.A. T.B. designed  
53 research; R.C.W., J.S., M.R. performed research; R.C.W., J.S. analyzed data; R.C.W., J.A.W, L.B.,  
54 K.B., A.C., D.L., B.M., C.K.O., C.O. collected data; R.W., J.S., J.A.Z., T.B., A.F.K.P, M.R., L.B.,  
55 K.B., S.B., A.C., P.H., D.L., C.O., H.R., K.A. wrote the paper.

56 **This PDF file includes:**

57 Main text

58 Figures 1 to 7

59 Tables 1 and 2

60 Supplementary Tables S1 to S4

61 Supplementary Figures S1 to S9

62 **Data and code availability statement:** All data and code will be publicly archived and given a unique  
63 DOI on acceptance. Code for the machine learning model is available for review online at  
64 [https://github.com/Appsilon/gabon\\_wildlife\\_training](https://github.com/Appsilon/gabon_wildlife_training). R code to ecological analyses are available for  
65 review online at [https://github.com/rcwhytock/Whytock\\_and\\_Swiezewski\\_et\\_al\\_2020/](https://github.com/rcwhytock/Whytock_and_Swiezewski_et_al_2020/).

## 66 **Abstract**

67 Ecological data are increasingly collected over vast geographic areas using arrays of digital sensors.  
68 Camera trap arrays have become the ‘gold standard’ method for surveying many terrestrial mammals  
69 and birds, but these arrays often generate millions of images that are challenging to process. This  
70 causes significant latency between data collection and subsequent inference, which can impede  
71 conservation at a time of ecological crisis. To address this, machine learning algorithms have been  
72 developed to improve data processing speeds, but these models are not considered accurate enough for  
73 fully automated labeling. Here, we present a new approach to building and testing a high performance  
74 machine learning model for fully automated labeling of camera trap images. As a case-study, the model  
75 classifies 26 Central African forest mammal and bird species (or groups). The model was trained on a  
76 relatively small dataset (c.300,000 images) but generalizes to fully independent data and outperforms  
77 humans in several respects (e.g. detecting ‘invisible’ animals). We show how the model’s precision and  
78 accuracy can be evaluated in an ecological modeling context by comparing species richness, activity  
79 patterns and occupancy derived from machine learning labels with the same estimates derived from  
80 expert labels. Results show that fully automated labels can be equivalent to expert labels when  
81 calculating these widely-used ecological metrics. We provide the user-community with a multi-  
82 platform user interface for running the model offline, and conclude that high performance machine  
83 learning models can fully automate labeling of camera trap data.

84

## 85 **Significance statement**

86 Large-scale ecological monitoring can be used to detect ecosystem change. Ecological sensors such as  
87 camera traps are deployed across large spatial and temporal scales to monitor species and communities.  
88 Camera trap data are often vast (millions of images) and manual processing times cause significant  
89 latency between data collection and ecological inference. Existing machine learning models can reduce  
90 processing times but are rarely used in fully automated workflows for ecological analyses, mainly  
91 because users lack confidence in the model’s precision and accuracy. Here, we show a new, high  
92 performance machine learning model can be used to make ecological inference that is equivalent to  
93 using manually generated, expert labels. These results pave the way for large-scale, fully automated  
94 biodiversity monitoring and forecasting using camera trap arrays.

95

## 96 **Introduction**

97 The urgent need to understand how ecosystems are responding to rapid environmental change has  
98 driven a ‘big data’ revolution in ecology and conservation (1). High resolution ecological data are now  
99 streamed in real-time from satellites, Global Positioning System tags, bioacoustic detectors, cameras  
100 and other sensor arrays. The data generated offer considerable opportunities to ecologists, but chal-  
101 lenges such as data processing, data storage and data sharing cause latency between data gathering and  
102 ecological inference (i.e. creating derived ecological metrics, testing ecological hypotheses and quanti-  
103 fying ecological change), sometimes in the order of years or more. Overcoming these challenges could  
104 open the gateway to ecological ‘forecasting’, where directional changes in ecological processes are de-  
105 tected in real time and near-term responses are predicted effectively using an iterative data gathering,  
106 model updating and model prediction approach (2).

107

108 Digital camera traps or wildlife ‘trail cams’ have revolutionized wildlife monitoring and are now the  
109 ‘gold standard’ for monitoring many medium to large terrestrial mammals (3). Animals and their be-  
110 havior are identified in images either by manual labeling, using citizen science platforms (4) or, more  
111 recently, by using machine learning models (5–7). Machine learning models can at minimum separate  
112 true animal detections from non-detections (8) or in the most advanced examples identify species,  
113 count individuals and describe behavior (5). These recent advances in machine learning have increased  
114 the speed at which camera trap data are analyzed but, in all cases we are aware of, the outputs (e.g.  
115 species labels) are not used to make ecological inference directly. Instead, machine learning models are  
116 typically used as a ‘first pass’ to identify and group images belonging to individual species for full or  
117 partial manual validation at a later stage, or to cross-validate labels from citizen science platforms (7).  
118 This can substantially reduce manual labeling effort but many hundreds or thousands of photos might  
119 still need to be labeled manually. Thus, although machine learning models are reducing manual data  
120 processing times, ecologists are not yet comfortable using the outputs (e.g. species labels) as part of a

121 completely automated workflow. This is despite the development of advanced machine learning mod-  
122 els that classify species in camera trap images with accuracy that matches or exceeds humans (5, 6).

123

124 One significant challenge limiting the application of machine learning models to camera trap data is  
125 that models rarely generalize well to completely out-of-sample data (i.e. data from new, spatially and  
126 temporally independent studies), particularly when used to classify animals to species level (9). Models  
127 can quickly learn the features of specific camera ‘stations’ (the spatial replicate in camera trap studies)  
128 such as the general background instead of learning features of the animal itself. This problem is further  
129 amplified by the fact that rare species in the training data might only ever appear at a limited number of  
130 camera stations, so training and validation data are rarely independent. Various approaches can be used  
131 to reduce these biases, such as carefully ensuring that training and validation data are independent (e.g.  
132 by using data from multiple studies), and by using data augmentation such as adding noise to training  
133 data in the form of image transformations. Until the problem of generalization can be overcome, ma-  
134 chine learning models for classifying camera trap images will remain an important tool for reducing  
135 manual labeling effort, but they will not achieve their full potential for creating fully automated pipe-  
136 lines for data analysis.

137

138 Machine learning models also have the potential to be deployed inside camera trap hardware in the  
139 field at the ‘edge’ (i.e. on micro-computers installed inside hardware that collects data), with summa-  
140 rized results (e.g. species labels) transmitted in real-time via a Global System for Mobile Communica-  
141 tions networks or via satellite (3). In geographically remote areas or time-sensitive situations (e.g. law  
142 enforcement) this would greatly reduce the latency between data capture and interpretation, and reduce  
143 the expense and effort required to collect data in remote regions by removing the need to transfer data-  
144 heavy images across wireless networks. However, before ‘smart’ cameras become a reality, it is essen-  
145 tial that users understand how uncertainty in machine learning model predictions might impact derived  
146 ecological metrics and analyses, which are often sensitive to biases (e.g. false positives in occupancy

147 models). To achieve this, there is a need to develop workflows that test the performance of machine  
148 learning models in an ecological modeling context that goes beyond simple measures of precision and  
149 accuracy.

150

151 Ideally, if machine learning models had 100% precision and accuracy (e.g. for species identification),  
152 camera trap data could be collected, labeled automatically using the model and the results used to di-  
153 rectly calculate ecological metrics or as variables in ecological models. However, the reality is that ma-  
154 chine learning models are imperfect. It is therefore uncertain what levels of precision and accuracy are  
155 needed to meet the requirements of ecological analyses. This is particularly the case for the spatial and  
156 temporal analyses of animal distributions in camera trap data, which require specialized ecological  
157 models (e.g. occupancy models) that account for imperfect detection (10).

158

159 In this paper, we describe the approach used to build a new high-performance machine learning model  
160 that identifies species in camera trap images (26 species/groups of Central African forest mammals and  
161 birds) that generalizes to spatially independent data. To evaluate how well the machine learning model  
162 labeling precision and accuracy performs in an ecological modeling context, we (1) evaluate how un-  
163 certainties in the precision and accuracy of machine learning labels affect ecological inference (derived  
164 metrics of species richness, activity patterns and occupancy) compared to the same metrics calculated  
165 using expert, manually generated labels, and (2) propose a workflow to ‘ground truth’ the performance  
166 of machine learning models for camera trap data in an ecological modeling context. We discuss the im-  
167 plications of these results for making fully automated ecological inference from camera trap data using  
168 the outputs of machine learning models. We also provide the user community with an easily installed,  
169 open-source graphical user interface that needs no understanding of machine learning to run the model  
170 offline on both camera trap images and videos.

171

172

## 173 **Methods**

### 174 ***Data preparation***

175 As a case study, the model was developed for classifying terrestrial forest mammals and birds in Cen-  
176 tral Africa (see Table S1 for further details on species and groups), where camera traps are now fre-  
177 quently deployed over large spatial scales to survey secretive birds and mammals in remote and inac-  
178 cessible landscapes (11–13). Training data were obtained from multiple countries and sources (c.1.6  
179 million images; reduced to  $n = 347120$  images after data processing; Table 1). Each source used differ-  
180 ent camera trap models (Reconyx, Bushnell, Cuddeback, Panthera Cams) and images were diverse in  
181 resolution, quality (e.g. sharpness, illumination) and color. Individual studies also used different field  
182 protocols for camera deployment but all were focused on detecting terrestrial forest mammals, with  
183 cameras installed on trees approximately 30 - 40 cm above ground level. The exception to this was data  
184 from (14) who installed cameras at a height of approximately 1 m for the primary purpose of detecting  
185 forest elephants *Loxodonta cyclotis*. Camera trap configuration was set to be highly sensitive in some  
186 cases and images were often captured in a series of rapid, short bursts (e.g. taking 10 images consecu-  
187 tively). This resulted in long sequences of very similar images, for example showing an animal walking  
188 in front of the camera (Figure S1).

189 **Table 1.** Sources of training data used to train the machine learning model for classifying species in  
190 camera trap images, sorted by number of images provided. The final subset of data used to train the  
191 model was  $n = 347120$  images (see later).

| Source               | Country           | Reference | $n$ images |
|----------------------|-------------------|-----------|------------|
| Anabelle Cardoso     | Gabon             | (14)      | 102418     |
| Kelly Boekee         | Cameroon          | -         | 123954     |
| Cisquet Kiebou Opepa | Republic of Congo | -         | 60393      |
| Joeri Zwerts         | Cameroon          | -         | 36027      |
| Laila Bahaa-el-Din   | Gabon             | (15)      | 16558      |
| Stephanie Brittain   | Cameroon          | -         | 7770       |

193 It was important to account for image sequences when selecting a validation set during the model train-  
194 ing phase, since there was a risk of highly similar images being present in both the training and valida-  
195 tion sets. To address this issue, the training and validation split was performed based on image meta-  
196 data (timing of images and image source) to identify unique ‘events’ and camera locations that were  
197 not replicated across the training and validation split (5). This solution posed a challenge for maintain-  
198 ing class balances in the training and validation sets, but it reduced the risk non-independent training  
199 and validation sets. A total of 27 classes were used to train the model, which were mostly mammals or  
200 mammal groups ( $n = 21$ ), birds ( $n = 4$ ), humans ( $n = 1$ ) and ‘blank’ images (i.e. no mammal, bird or  
201 human). Details of taxonomy and justification for species groups are in Table S1.

202

### 203 ***Issues identified in the training data***

204 Our ‘real-life’ training data had not been pre-processed or professionally curated for the purposes of  
205 training machine learning models and naturally contained errors that arise from hardware faults, human  
206 error and different approaches to manual species labeling by experts. We identified three primary  
207 sources of error. The first was over-exposed images (a hardware fault) where the image foreground was  
208 ‘flooded’ by the flash (usually at night), making the image appear mostly white. Animals in these  
209 images were sometimes partially visible and could be classified by a skilled human observer, despite  
210 the loss of color information, texture and other detail. However, over-exposed images presented a  
211 challenge for the machine learning model because white dominated the image regardless of the species.

212

213 The second main source of error was caused by under-exposed images. This error was revealed after  
214 inspecting model outputs during the training phase, and showed that highly under-exposed images  
215 appeared almost entirely or entirely black to a human observer, but the machine learning model was  
216 capable of using information in the image to detect and correctly classify the species (Figure 1).

217



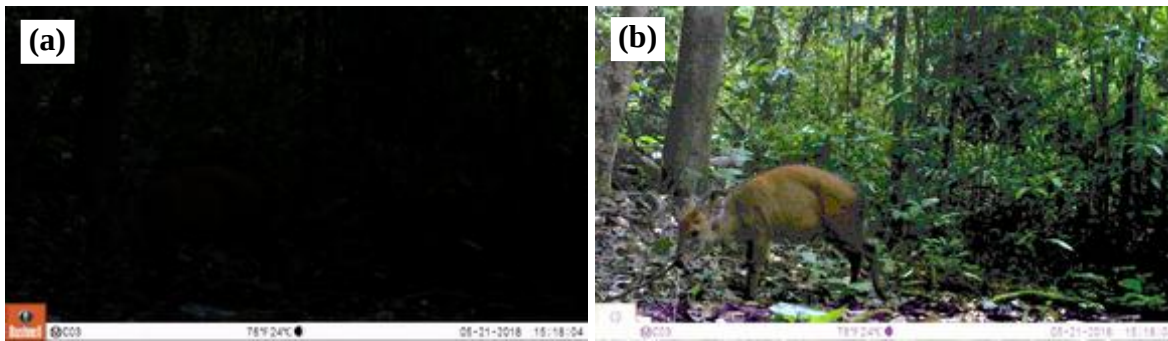

218

219 **Figure 1.** (a) Raw image from the dataset, labeled by experts as "blank", but classified by the machine  
220 learning model with high certainty as a red duiker. (b) The same image as in (a), but manually  
221 brightened by narrowing the displayed color spectrum, reveals a red duiker is present and the model  
222 was correct.

223

224 The final source of error in the training data was mis-labeled images (e.g. confusing similar species,  
225 such as chimpanzee *Pan troglodytes* and gorilla *Gorilla gorilla*) and using different approaches to  
226 labeling, for example one data source combined all primates into 'monkey', whereas other data sources  
227 separated apes from other primates.

228

229 We used an iterative approach to address these issues that consisted of model training, validation, error  
230 correction (correcting mis-labeled images in the training data) and model updating. In particular, we  
231 carefully inspected images that appeared to be incorrectly labeled by the model, but which were labeled  
232 with high confidence. This approach revealed hidden problems in the data, such as the presence of  
233 animals in under-exposed images that would have otherwise led us to underestimate the model's  
234 performance.

235

236

## 237 ***Machine learning model***

238 We chose the established ResNet50 architecture to build the model (16). Transfer learning was used to  
239 speed up training and we used weights pre-trained on the ImageNet dataset. We identified species using  
240 the entire image frame without using bounding boxes and used basic augmentation (horizontal flips, ro-  
241 tations, zoom, lighting and contrast adjustments, and warps) during training, but not during model vali-  
242 dation. We used one-cycle policy training (17) and trained using progressive resizing in two stages. De-  
243 tails on the training scheme and implementation can be found in our GitHub repository ([https://github.-](https://github.com/Appsilon/gabon_wildlife_training)  
244 [com/Appsilon/gabon\\_wildlife\\_training](https://github.com/Appsilon/gabon_wildlife_training)). It is worth noting that most of the training approaches and  
245 many of the mechanisms we used to enhance training were taken directly or almost directly from the  
246 fast.ai Python library (<https://github.com/fastai>), exemplifying how exceptionally robust the library is.  
247 We trained the models on various virtual machines equipped with GPU processing units, run on Google  
248 Cloud Platform with resources granted by a Google Cloud Education grant.

249

## 250 ***Out-of-sample test data***

251 One of the major limitations to model performance for camera trap images is the ability to generalize  
252 predictions to new, independent camera stations, i.e. unique locations with different backgrounds not  
253 seen during model training (9). Since our objective was to create a model that could generalize well to  
254 new study sites, we tested the final model's performance using a new out-of-sample dataset that was  
255 completely spatially and temporally independent from the data used to train the model. These out-of-  
256 sample data consisted of images from 227 camera stations surveyed between 16 January 2018 and 4  
257 October 2019 in central and southern Gabon in closed canopy forest. Cameras also differed from the  
258 models used in the training data (Panthera Cams V4 and V5), but field protocols were similar and cam-  
259 eras were placed approximately 30 cm above the ground on a tree at a distance of c. 3 – 5 m perpendic-  
260 ular to the center of animal trails. Single-frame images were captured using medium sensitivity set-  
261 tings, and images were separated by a minimum of 1 s. The aim of the study was to survey the small-

262 to-large mammal community, with a particular focus on great apes (*Pan troglodytes*, *Gorilla gorilla*),  
263 forest elephants *Loxodonta cyclotis*, leopard *Panthera pardus* and golden cat *Caracal aurata*. These  
264 data ( $n = 23868$  images, median 75, range 1 - 545 images per station) were manually labeled by an ex-  
265 pert (co-author CO).

266

### 267 **Summary of model's general performance**

268 To allow general comparison of our model's performance with other similar models in the literature (5-  
269 7) we calculated top-one and top-five accuracies using the out-of-sample data. Top-one accuracy is the  
270 percent of expert labels that match the top-ranking label generated by the machine learning model.

271 Top-five accuracy calculates the percent of expert labels that match any of the top five ranking machine  
272 learning generated labels. Top-one accuracy for the overall machine learning model was 77.63% and  
273 top-five accuracy was 94.24% (Table S2; Figures S2 & S3). After aggregating labels of similar species  
274 that were frequently mis-classified by the model into a reduced set of 11 classes, top-one and top-five  
275 accuracies increased to 79.92% and 95.99%, respectively (Figure S4). The model can classify around  
276 4000 images (c.0.5 MB in size) per hour using an Intel® Core™ i7-8665U CPU @ 1.90GHz × 8 and  
277 the model can operate 24/7 if necessary. For comparison, based on our experience, manual labeling can  
278 be done at speeds ranging from 125 to 500 images per hour depending on the quality of the images and  
279 if images are captured in sequences (which can be faster to label manually).

280

281 We also compared the precision and recall for each species from our optimal model (see later, Table 2)  
282 with precision and recall for the same species reported for the model used by the WildlifeInsights web-  
283 platform ([www.wildlifeinsights.org](http://www.wildlifeinsights.org)). This global project uses a deep convolutional neural network  
284 trained using Google's Tensorflow framework and a training dataset of 8.7M images, comprising 614  
285 species.

286

## 287 ***Comparing derived ecological metrics using machine learning labels and expert labels***

288 We calculated three common ecological metrics for the out-of-sample data (raw species richness at in-  
289 dividual camera stations, activity patterns for four focal species, and occupancy for four focal species)  
290 separately using the manually generated, expert labels and the machine learning generated labels.  
291 Species richness (the number of species in a discrete unit of space and time) can be used to quantify  
292 temporal and spatial changes in biodiversity. Although other measures of species diversity exist, we  
293 chose this simple metric because it is widely used in the ecology literature despite its limitations. Activ-  
294 ity patterns describe the diel activity patterns of focal species (18) and are typically calculated to under-  
295 stand fundamental life history traits and behavior such as temporal niche partitioning. Occupancy mod-  
296 els are hierarchical models commonly fitted to camera trap data because they can account for imperfect  
297 detection (which rarely equals 1) to estimate the conditional probability that a site is ‘occupied’ by a  
298 species given it was not detected (10). Covariates such as measures of vegetation cover can be included  
299 in both the detection and occupancy component models. These models are relatively complex, and  
300 small changes in detection histories (presence or absence of a species during a discrete time interval),  
301 false positives or false negatives can dramatically affect results (19). We therefore predicted that occu-  
302 pancy estimates obtained using machine learning generated labels would compare poorly with esti-  
303 mates using expert, manually generated labels.

304

305 The four focal species used for calculating activity patterns and occupancy were African golden cat,  
306 chimpanzee, leopard and African forest elephant. These species were chosen because they were the  
307 focus of the camera trap survey that generated the out-of-sample test data and because they are  
308 conservation priority species in Central Africa. We also initially included western lowland gorilla but  
309 we had too few unique captures of this species (only seven of 227 stations having > 5 captures) to fit  
310 either activity pattern models or occupancy models.

311

### 312 ***Thresholding and overall model performance***

313 All three metrics derived from machine learning labels were re-calculated using a threshold approach,  
314 where labels were excluded if the model's predicted confidence was below a given threshold. The  
315 thresholds tested ranged from 0 (no threshold) to 90%, increasing in 10% intervals. For each of the  
316 three ecological metrics, we then re-calculated results using the machine learning labels and compared  
317 these with results from the expert labeled dataset using various statistical measures (see later). We also  
318 calculated the effect of removing data on sample size, top-one balanced accuracy and top-five accuracy  
319 for the overall model, and on four standard measures of model precision and accuracy (precision, re-  
320 call, F1 score, and balanced accuracy for each species using the `confusionMatrix` function in the  
321 `caret` R package (20).

322

323 Estimated species richness from machine learning generated labels and expert labels was compared  
324 using linear regression fitted by least squares. Species richness from expert labels was used as the  
325 predictor variable and species richness from machine learning labels was used as the response. For each  
326 threshold, we evaluated how well species richness from machine learning labels correlated with expert  
327 labels by calculating the slope coefficient and variance explained ( $R^2$ ).

328

329 Diel activity patterns were calculated for all four focal species using the `fitact` function (200 boot-  
330 strap replicates from the model) using the `activity` R package (18, 21). For each species and threshold  
331 combination, we tested if there was a significant difference in diel activity (proportion of 24 h day ac-  
332 tive) estimated by machine learning labels and expert labels using the `compareAct` function, expect-  
333 ing no difference using an alpha level of 0.05.

334

335 Single season, single species occupancy models were fitted using the `occu` function from the un-  
336 marked R package (22). Detection histories were collapsed to five-day occasion lengths as a compro-

337 mise between achieving model stability and ensuring an adequate number of replicates for each site. In  
338 the detection component model, we included Elevation (m), Date (first day of the five day occasion  
339 length) and Date<sup>2</sup> (to allow for non-linear, seasonal changes in detection) as covariates. In the occu-  
340 pancy component model, Elevation (m), Distance to the Nearest River (m), Distance to the Nearest  
341 Road (m) and mean distance to the Nearest Village (m) were included as continuous predictors without  
342 interactions. All covariates were mean-centered and scaled by 1 SD to prevent convergence issues. We  
343 did not perform model selection and predicted occupancy for the 227 camera stations using the full  
344 model. We then compared occupancy predictions ( $n = 227$  camera stations) for no threshold (i.e. using  
345 all data), and the nine thresholds using linear regression fitted by least squares as described previously  
346 for the species richness comparison.

347

## 348 **Results**

### 349 *Effect of thresholding on overall model performance*

350 Regardless of the threshold used, top-five accuracy for the overall model predictions on the out-of-  
351 sample data were consistently close to or above 95% (Figure 2). To achieve a top-one balanced  
352 accuracy of 90% or more for the overall model, a threshold of  $\geq 70\%$  confidence was required and  $>$   
353 25% of the data were discarded (Figure 2). With a threshold of 70% confidence (i.e. excluding labeled  
354 images below 70% confidence), top-one balanced accuracies for 16 of the 27 classes were  $> 90\%$  and a  
355 further five were  $> 75\%$  (Table 2). Top-one balanced accuracies for the remaining seven classes ranged  
356 from 50% to 70% (Table 2). All other measures of accuracy and precision at all thresholds are in Table  
357 S3 and Figure 3 shows the confusion matrix for the out-of-sample data after excluding labels below  
358 70% confidence (see Figure S5 for the confusion matrix of aggregated labels after thresholding).

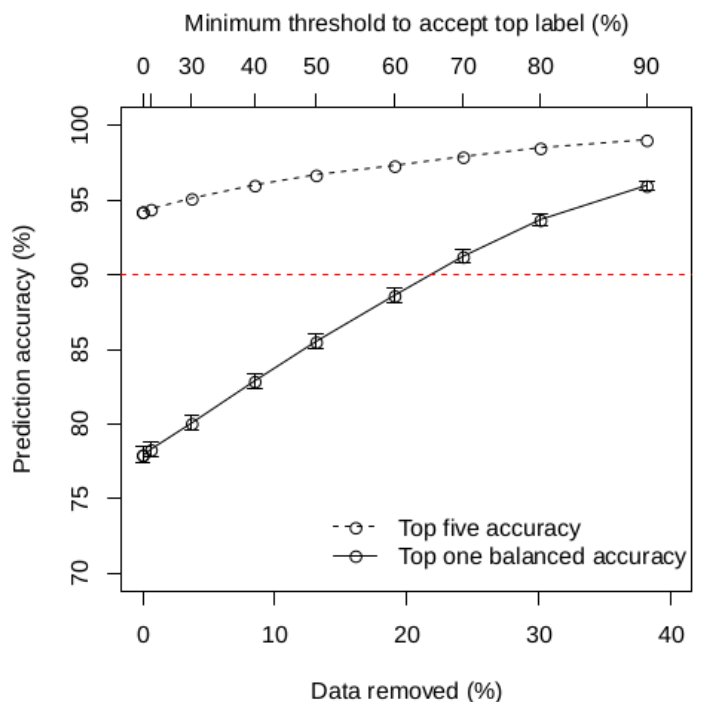

359

360 **Figure 2.** Relationship between threshold level to accept top label, % of data discarded and overall top-  
 361 five and top-one balanced accuracy (+/- 95% CI) for predictions on out-of-sample test data.

362

363 **Table 2.** Precision, recall, accuracy, F1 score and prevalence (%) for the 27 classes (Table S1) in the  
 364 out-of-sample test data after removing labels with a predicted confidence < 70%. Species are sorted  
 365 from lowest to highest balanced accuracy. For comparison, the precision and recall for the model used  
 366 by the wildlifeinsights.org web platform are given in brackets. Orange indicates our model performed  
 367 worse than the WildlifeInsights model for a given species, and purple indicates our model performed  
 368 better. Note that this comparison should be interpreted with caution. Ideally, we would run the  
 369 WildlifeInsights model on our out-of-sample test data, but data sharing restrictions prevented this.  
 370 Where our species or groups could not be compared with an equivalent class on WildlifeInsights this is  
 371 indicated as no equivalent class (NE). If precision and recall cannot be estimated because of  
 372 insufficient training and validation data this is indicated as ‘needs more data’ (NMD).

| Species                         | Precision % | Recall %   | F1 | Prevalence | Balanced Accuracy |
|---------------------------------|-------------|------------|----|------------|-------------------|
| Civet_African_Palm              | NMD (NMD)   | NMD (NMD)  | NA | NA         | NA                |
| Gorilla                         | NMD (NMD)   | NMD (NMD)  | NA | 0.4        | 50                |
| Rail_Nkulengu                   | 0.0 (47.2)  | 0.0 (48.6) | NA | NA         | 50                |
| Guineafowl_Crested <sup>a</sup> | 100 (99.8)  | 5.3 (91.2) | 10 | 0.1        | 52.6              |

|                            |                     |                    |      |      |      |
|----------------------------|---------------------|--------------------|------|------|------|
| Mandrillus                 | <b>83.9</b> (96.1)  | <b>29</b> (72.3)   | 43.1 | 1.8  | 64.5 |
| Blank                      | 98.1 (98.3)         | <b>40.3</b> (78.7) | 57.1 | 3.6  | 70.1 |
| Buffalo_African            | <b>97.5</b> (91.1)  | <b>55.7</b> (73.6) | 70.9 | 1.2  | 77.8 |
| Bird                       | 11.2 (NE)           | 60.0 (NE)          | 18.9 | 0.1  | 79.7 |
| Chevrotain_Water           | <b>100</b> (NMD)    | <b>67.4</b> (NMD)  | 80.6 | 0.2  | 83.7 |
| Guineafowl_Black           | <b>70.6</b> (79.6)  | <b>72.7</b> (79.5) | 71.6 | 0.2  | 86.3 |
| Cat_Golden                 | <b>96.0</b> (NMD)   | <b>78.0</b> (NMD)  | 86.1 | 1    | 89   |
| Pangolin                   | <b>94.1</b> (NMD)   | <b>80.0</b> (NMD)  | 86.5 | 0.1  | 90   |
| Duiker_Yellow_Backed       | <b>97.5</b> (88.8)  | <b>83.8</b> (72.3) | 90.2 | 2.9  | 91.9 |
| Human                      | <b>78.4</b> (84.8)  | <b>87.4</b> (75.2) | 82.6 | 4    | 93.2 |
| Chimpanzee                 | <b>83.5</b> (87)    | <b>88.4</b> (71.4) | 85.9 | 2.2  | 94   |
| Monkey                     | 70.7 (NE)           | 92.0 (NE)          | 80   | 2.9  | 95.4 |
| Mongoose                   | <b>83.5</b> (NMD)   | <b>91.0</b> (NMD)  | 87.1 | 0.4  | 95.5 |
| Rat_Giant                  | <b>68.2</b> (76)    | <b>93.8</b> (75.8) | 78.9 | 0.1  | 96.9 |
| <sup>b</sup><br>Duiker_Red | <b>95.9</b> (95.6)  | <b>96.5</b> (79.6) | 96.2 | 30.8 | 97.3 |
| Duiker_Blue                | <b>90.04</b> (98.2) | <b>97.0</b> (65.7) | 93.6 | 17.6 | 97.4 |
| Hog_Red_River              | <b>97.0</b> (82.7)  | <b>95.7</b> (84.7) | 96.3 | 6.5  | 97.7 |
| Squirrel                   | <b>85.9</b> (98.6)  | <b>95.8</b> (67.6) | 90.6 | 0.9  | 97.8 |
| Leopard_African            | <b>92.8</b> (85.2)  | <b>96.0</b> (61.4) | 94.4 | 2.2  | 97.9 |
| Elephant_African           | <b>91.9</b> (94.4)  | <b>98.4</b> (84.2) | 95.1 | 19.3 | 98.2 |
| Porcupine_Brush_Tailed     | <b>93.9</b> (89.4)  | <b>98.9</b> (42.1) | 96.3 | 0.5  | 99.4 |
| Genet                      | <b>95.3</b> (89.2)  | <b>99.3</b> (65.6) | 97.2 | 0.8  | 99.6 |
| Mongoose_Black_Footed      | <b>92.9</b> (NMD)   | <b>100</b> (NMD)   | 96.3 | 0.1  | 100  |

a

373 Used precision and recall for similar *Guttera plumifera* from WildlifeInsights

b

374 Used precision and recall for *Cephalophus callipygus* from WildlifeInsights

375



376

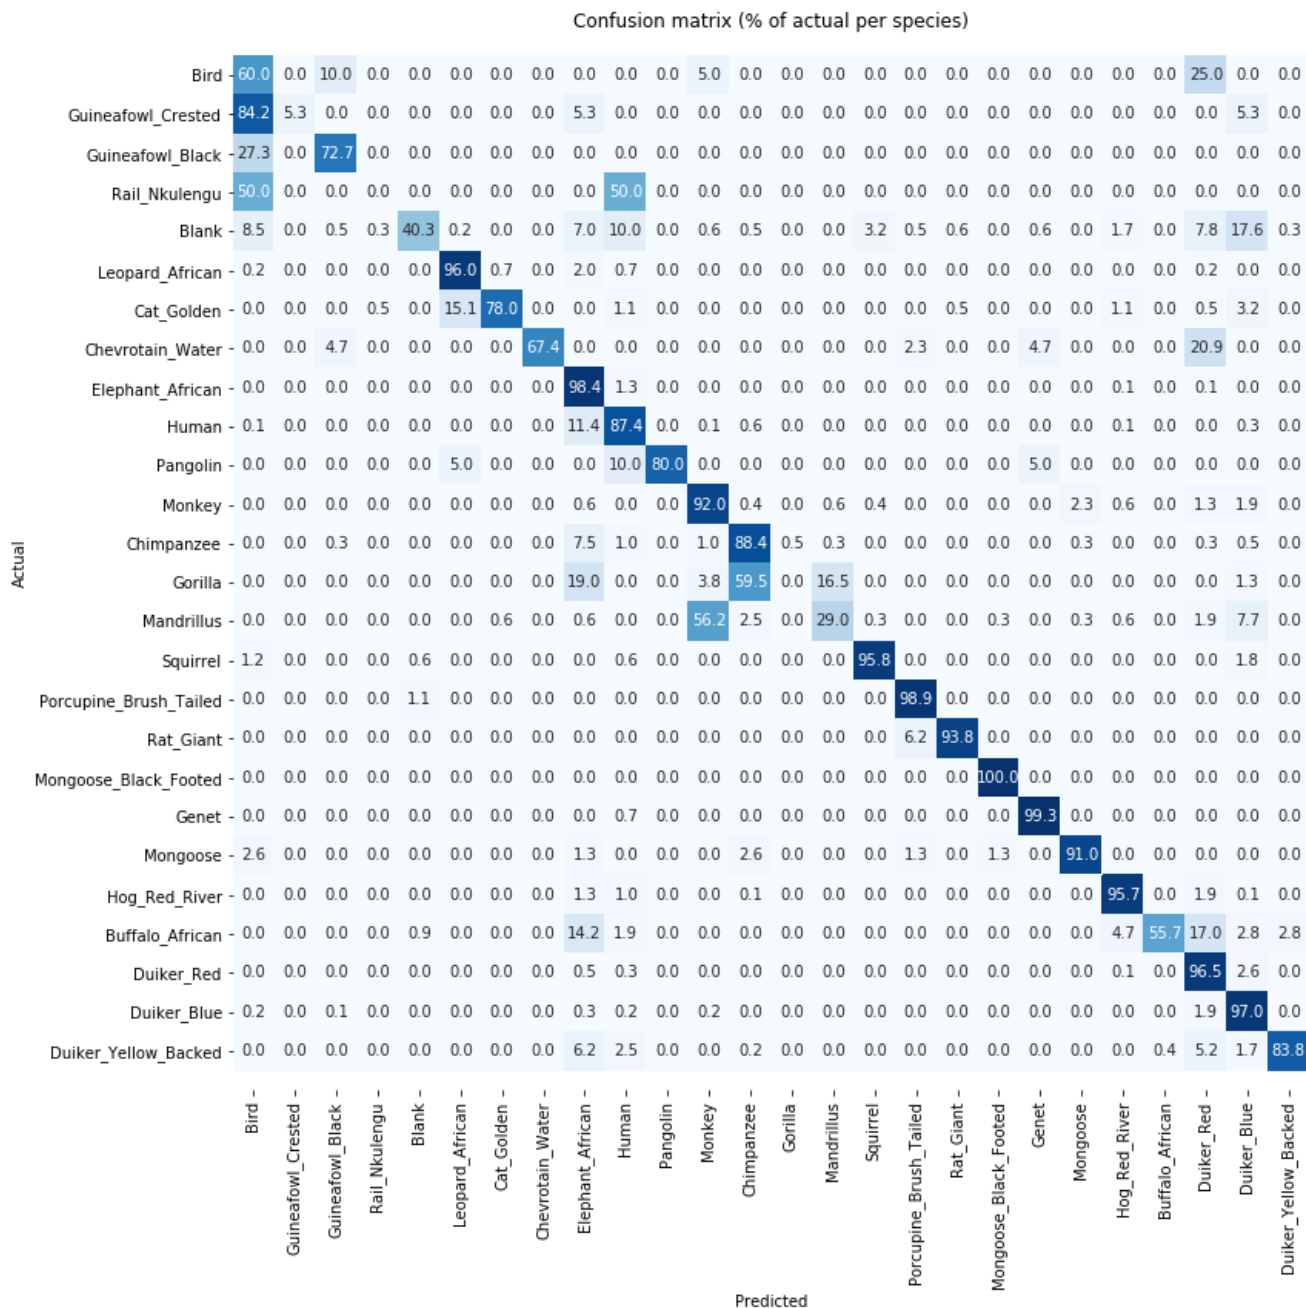

377

378 **Figure 3.** Confusion matrix (% correct labels for each species/group) showing model performance on  
 379 out of sample test data after excluding labels below a confidence threshold of 70% (each row is  
 380 normalized independently). Figure S6 shows the confusion matrix with absolute numbers.

381

382

383 **Species richness**

384 Species richness estimated by machine learning labels and expert labels was strongly correlated at all  
385 thresholds used (Figure 4). There was a general tendency for species richness to be underestimated by  
386 machine learning as the threshold increased, and the slope of the relationship was close to 1 with no  
387 threshold.

388

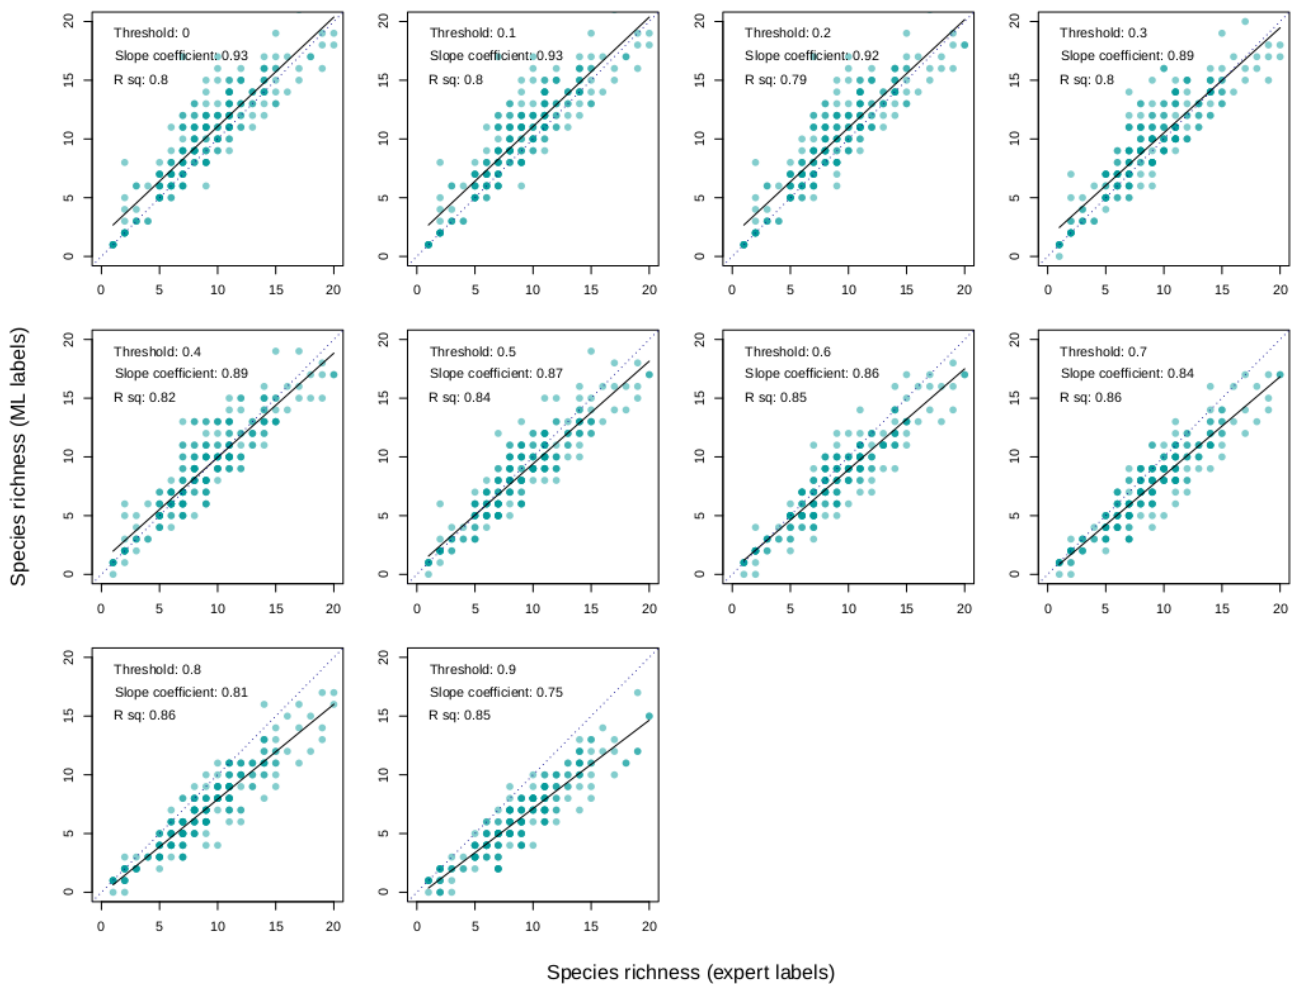

389

390 **Figure 4.** Relationship between species richness at each camera station ( $n = 227$ ) predicted by the  
391 machine learning model (y-axis) and species richness predicted from expert labels (x-axis) for no  
392 threshold and the nine thresholds used after predicting on the out-of-sample test data. The dotted line  
393 shows where a 1:1 relationship would fit the data.

394

395 **Activity patterns**

396 Above a threshold of 70% there was no significant difference between diel activity patterns estimated  
397 by machine learning labels and expert labels for all four focal species in the out-of-sample test data  
398 (Figure 5; Table S4).

399

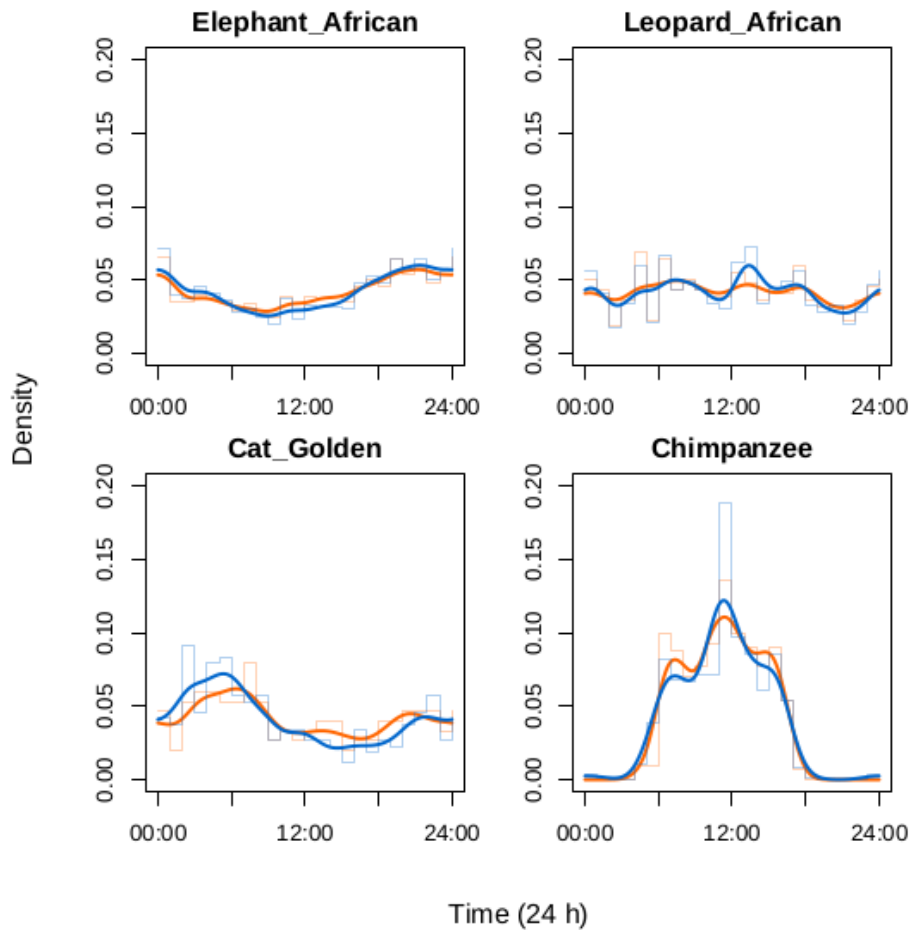

400

401 **Figure 5.** Estimated activity patterns for the four focal species in the out-of-sample test data using  
402 machine learning labels (orange;  $n = 18078$  observations after excluding labels below 70%  
403 confidence) and expert labels (blue;  $n = 23868$  observations).

404

405

## 406 **Occupancy models**

407 As expected, occupancy estimates made using machine learning labels were sometimes inconsistent  
408 with those made using expert labels, and thresholding had a dramatic impact on inference in some  
409 cases (Figure 6). For golden cat and leopard, which are predicted with high accuracy and precision by  
410 our machine learning model, occupancy estimates from machine learning labels and expert labels were  
411 highly correlated at all thresholds (Figure S8). African elephant occupancy estimates using machine  
412 learning labels improved dramatically as the threshold increased, but chimpanzee occupancy estimates  
413 from machine learning labels were consistently uncorrelated with those estimated using expert labels  
414 (Figure 6).

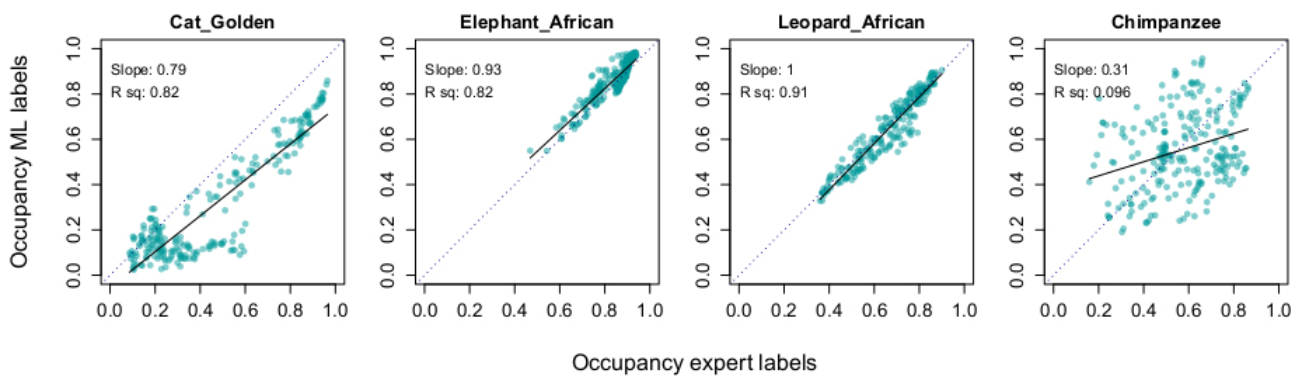

415 **Figure 6.** Relationship between estimated occupancy probability for  $n = 227$  camera stations (points)  
416 from machine learning (ML) labels (y-axis) and expert labels (x-axis) for the four focal species after  
417 discarding labels below a 90% threshold of predicted confidence. Plots for all thresholds tested are  
418 shown in Figure S8.

419

## 420 **Discussion**

421 Machine learning models have the potential to fully automate labeling of camera trap images without  
422 the need for manual validation. This would allow ecologists to rapidly process data and use the outputs  
423 (e.g. species labels) directly in ecological analyses, but it has been uncertain how this can be achieved.

424 In particular, models published to date do not evaluate their predictive performance in an ecological  
425 modeling context (5–7, 9). Here, we compared ecological metrics calculated on an out-of-sample test  
426 dataset using machine learning labels with the same metrics calculated using expert, manually gener-  
427 ated labels. Using our new, high performance species classification model that generalizes to out-of-  
428 sample data, we show machine learning labels can be used in a fully automated workflow that removes  
429 the need for manual validation prior to conducting ecological analyses.

430

431 We used an established architecture for the machine learning model. However, other more recent archi-  
432 tectures could yield further increases in performance. The ResNeXt (23), the ResNeSt (24) and the Ef-  
433 ficientNet (25) families of network architectures are particularly worth exploring in this context. An-  
434 other avenue of possible further improvement is to use an approach based on a sequence of models.  
435 One natural step is to first detect a bounding box for an animal with a localisation model (26) and later  
436 classify only the content found in that box. Independently, another step can be introduced where a  
437 model is trained to first identify an aggregated species class (comprised of species that share similar  
438 characteristics; e.g. see Figure S4), and later dedicated models are trained to identify the individual  
439 species within these aggregated classes.

440

441 We used a relatively small training set (*c.* 300,000 images here vs 3.2 million in (5) and 8.7M used by  
442 (27)) and a large number of individual classes, yet our model achieved high precision and accuracy  
443 even when tested on completely out-of-sample data, which is considered a significant challenge for the  
444 field (9, 26). We believe this encouraging result can be explained both by the machine learning ap-  
445 proaches used (e.g. the fast.ai framework and image augmentation), and because forest camera traps in  
446 the tropics are often deployed in very similar settings, with animals captured at a predictable distance  
447 from the camera (usually on a path) with a general background of green and brown vegetation. This is  
448 in contrast to camera trap images from more open habitats, where animals are detected across a wide  
449 range of distances and backgrounds (9). On the other hand, informational richness in the background of



450 photos taken in forest settings poses a significant challenge to machine learning models as well as hu-  
451 man experts, as illustrated in Figure 7.

452

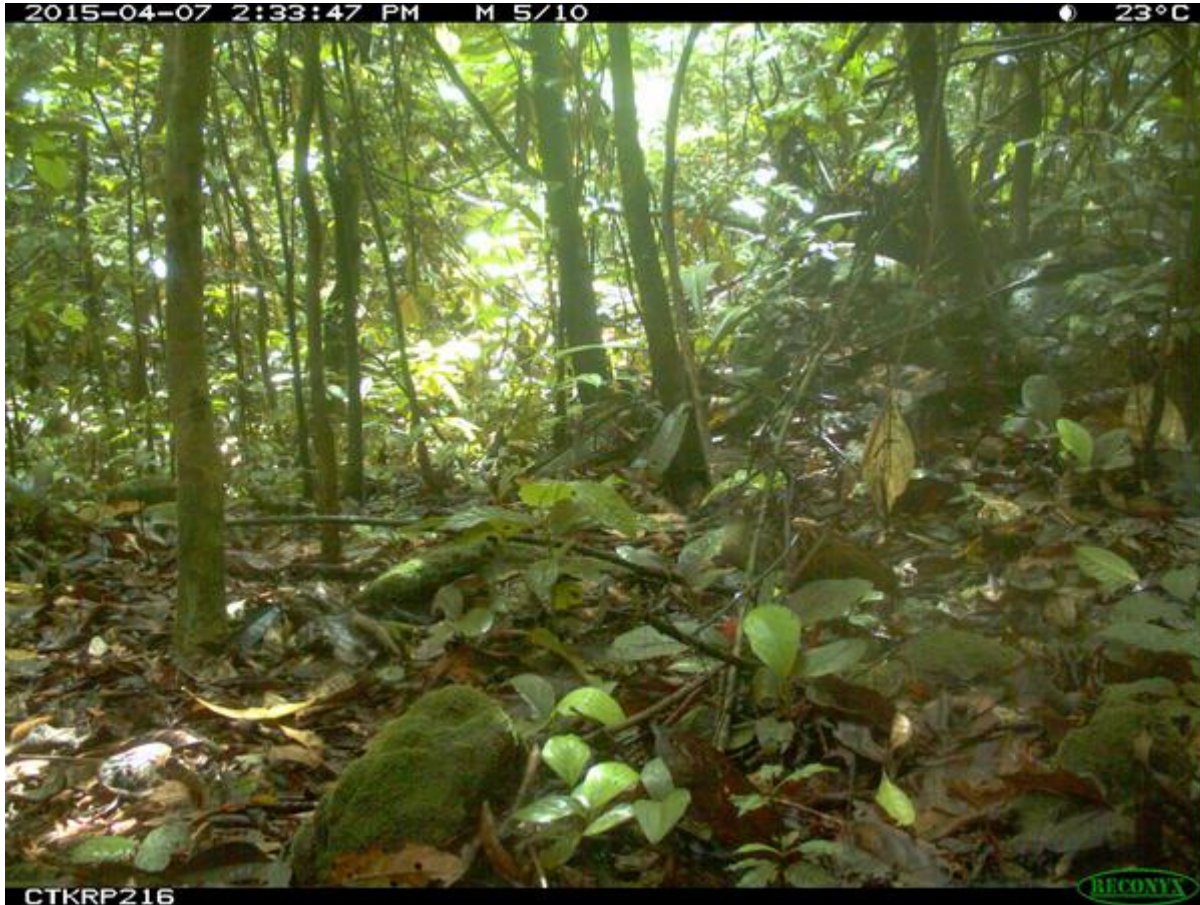

453

454 **Figure 7.** An image correctly classified as nkulengu rail by our machine learning model but marked as  
455 blank by an expert. The bird is visible slightly right of center. The dark beak is pointing left and most  
456 of the body is hidden behind branches and leaves. A section of its characteristic red legs is visible  
457 between the leaves. The model used features from the beak and head region to identify the bird (see  
458 Figure S9).

459

460 Thresholding improved the overall performance of the model and its performance for individual  
461 species. In our tests we ‘discarded’ labels with low confidence but these data could equally be  
462 classified manually if sample sizes were small. It is important to note, however, that this additional  
463 effort to manually label low confidence images would not have improved inference in our example  
464 ecological analyses, with the exception of chimpanzee occupancy estimates. Chimpanzee images had

465 the lowest measure of precision among the four focal species, which suggests that true detection events  
466 were probably missed frequently, resulting in false negatives (Figure S2). Species that were classified  
467 with the highest precision and accuracy were either relatively unique in their shape, color and pattern  
468 (e.g. African leopard, the ‘Genet’ group) or were well represented in the training data. We recommend  
469 that users of our model in Central Africa use a threshold of 70% to accept labels and have created an  
470 offline, multi-platform software tool that can label large batches of images or videos, and display  
471 simple maps of species presence/absence and species richness. The software also outputs the labels in a  
472 format that can be used for calculating activity patterns or for use in occupancy models. We do not  
473 fully automate these analyses at present (in part because of logistical constraints and delays caused by  
474 the COVID19 pandemic), but we anticipate these features will be integrated into future releases.

475

476 If machine learning models can fully automate labeling of camera trap images, the first question likely  
477 to be posed by most ecologists is ‘Should we?’. Camera trap images contain a wealth of information  
478 beyond species identity that would be missed using our model such as behavior, demography, individ-  
479 ual phenotype and body condition. A trained model is also limited to detecting and classifying the  
480 species in the training dataset, and by definition cannot detect new species. Some machine learning  
481 models can already classify behavior (5) and other future models will achieve this and much more. In  
482 our opinion fully automated labels can and should be used in ecological analyses, but only after valida-  
483 tion (and re-validation) from an ecological perspective, and to answer clearly defined questions. Each  
484 use-case will also differ in the benefits that can be gained from fully automated analysis. A conserva-  
485 tion manager with tens of thousands of images collected on a rolling basis might accept a trade-off be-  
486 tween increased speed of data analysis and having to discard images with uncertain labels, but a scien-  
487 tist testing hypotheses for peer-reviewed publication might prefer to view all of the images manually.  
488 We recommend that in all cases models should be validated on a continual basis using sub-sampled  
489 data to detect potentially new or hidden biases. Model accuracy could change if field protocols or envi-

490 ronmental conditions change in unexpected ways (e.g. heavy snowfall in temperate zones). However,  
491 during model evaluation we found that expert labels in the training and validation data were also never  
492 themselves ‘perfect’, and perhaps high performance machine learning models offer a more consistent  
493 means of analyzing camera trap data than manual labeling because biases are predictable and can be  
494 quantified explicitly.

495

496 Camera traps are commonly used worldwide by conservation practitioners whose normal scope of  
497 work might not allow sufficient time for the handling, processing, and analyzing of large quantities of  
498 digital data. The authors personally know of several large camera trap databases that have not been an-  
499 alyzed years after data collection ended, often because of a lack of resources or technical expertise.

500 New web-based platforms for ecological data are seeking to address this problem by allowing users to  
501 upload data to the cloud where it is stored and analyzed using machine learning models (27, 28), but a  
502 lack of fast internet access can be a barrier to using such platforms and our offline application can fill  
503 this important gap. The next generation of camera traps will also have embedded machine learning  
504 models following the current rise in edge-computing technology. Together, edge and cloud computing  
505 will open the door to national and international real-time ecological forecasting at unprecedented spa-  
506 tial and temporal scales. We anticipate that the model, software and validation workflow presented here  
507 could revolutionize how camera trap data are processed and analyzed, and conclude that high perfor-  
508 mance machine learning models can be used for fully automated labeling of camera trap data for eco-  
509 logical analyses.

510

## 511 **Acknowledgments**

512 RW was funded by the EU 11eme FED ECOFAC6 program grant to the National Parks Agency of  
513 Gabon. Appsilon Data Science funded the machine learning model and software development costs.

514 Cloud computing costs were funded by a Google Cloud Education Grant awarded to KA. Camera trap



515 data from co-authors KB and CKO were kindly made available by the Tropical Ecology Assessment  
516 and Monitoring Network (now <https://wildlifeinsights.org>).

## 517 **References**

1. S. S. Farley, A. Dawson, S. J. Goring, J. W. Williams, Situating Ecology as a Big-Data Science: Current Advances, Challenges, and Solutions. *BioScience* **68**, 563–576 (2018).
2. M. C. Dietze, *et al.*, Iterative near-term ecological forecasting: Needs, opportunities, and challenges. *PNAS* **115**, 1424–1432 (2018).
3. P. Glover Kapfer, C. A. Soto Navarro, O. R. Wearn, Camera-trapping version 3.0: current constraints and future priorities for development. *Remote Sensing in Ecology and Conservation* **5**, 209–223 (2019).
4. A. Swanson, *et al.*, Snapshot Serengeti, high-frequency annotated camera trap images of 40 mammalian species in an African savanna. *Sci Data* **2**, 150026 (2015).
5. M. S. Norouzzadeh, *et al.*, Automatically identifying, counting, and describing wild animals in camera-trap images with deep learning. *PNAS* **115**, E5716–E5725 (2018).
6. M. A. Tabak, *et al.*, Machine learning to classify animal species in camera trap images: Applications in ecology. *Methods in Ecology and Evolution* **10**, 585–590 (2019).
7. M. Willi, *et al.*, Identifying animal species in camera trap images using deep learning and citizen science. *Methods in Ecology and Evolution* **10**, 80–91 (2019).
8. W. Wei, G. Luo, J. Ran, J. Li, Zilong: A tool to identify empty images in camera-trap data. *Ecological Informatics* **55**, 101021 (2020).
9. S. Beery, G. Van Horn, P. Perona, Recognition in Terra Incognita in (2018), pp. 456–473.
10. D. I. MacKenzie, *et al.*, Estimating Site Occupancy Rates When Detection Probabilities Are Less Than One. *Ecology* **83**, 2248–2255 (2002).
11. L. Bahaa el din, J. J. Cusack, Camera trapping in Africa: Paving the way for ease of use and consistency. *African Journal of Ecology* **56**, 690–693 (2018).
12. T. G. O’Brien, *et al.*, Camera trapping reveals trends in forest duiker populations in African National Parks. *Remote Sensing in Ecology and Conservation* **6**, 168–180 (2020).
13. M. Bessone, *et al.*, Drawn out of the shadows: Surveying secretive forest species with camera trap distance sampling. *Journal of Applied Ecology* **57**, 963–974 (2020).
14. A. W. Cardoso, *et al.*, The Role of Forest Elephants in Shaping Tropical Forest–Savanna Coexistence. *Ecosystems* **23**, 602–616 (2020).
15. L. Bahaa-el-din, *et al.*, Notes on the distribution and status of small carnivores in Gabon. **48**, 11 (2013).
16. K. He, X. Zhang, S. Ren, J. Sun, Identity Mappings in Deep Residual Networks in *Computer*

*Vision – ECCV 2016*, Lecture Notes in Computer Science., B. Leibe, J. Matas, N. Sebe, M. Welling, Eds. (Springer International Publishing, 2016), pp. 630–645.

17. L. N. Smith, A disciplined approach to neural network hyper-parameters: Part 1 -- learning rate, batch size, momentum, and weight decay. *arXiv:1803.09820 [cs, stat]* (2018) (September 10, 2020).
18. M. Rowcliffe, activity: Animal Activity Statistics. *R package v 1.3* (2019).
19. J. A. Royle, W. A. Link, Generalized Site Occupancy Models Allowing for False Positive and False Negative Errors. *Ecology* **87**, 835–841 (2006).
20. M. Kuhn, caret: Classification and Regression Training. *R package version 6.0-86* (2020).
21. J. M. Rowcliffe, R. Kays, B. Kranstauber, C. Carbone, P. A. Jansen, Quantifying levels of animal activity using camera trap data. *Methods in Ecology and Evolution* **5**, 1170–1179 (2014).
22. I. Fiske, R. Chandler, unmarked: An R Package for Fitting Hierarchical Models of Wildlife Occurrence and Abundance. *Journal of Statistical Software* **43**, 1–23 (2011).
23. S. Xie, R. Girshick, P. Dollar, Z. Tu, K. He, Aggregated Residual Transformations for Deep Neural Networks in (2017), pp. 1492–1500.
24. H. Zhang, *et al.*, ResNeSt: Split-Attention Networks. *arXiv:2004.08955 [cs]* (2020) (September 10, 2020).
25. M. Tan, Q. V. Le, EfficientNet: Rethinking Model Scaling for Convolutional Neural Networks. *arXiv:1905.11946 [cs, stat]* (2020) (September 10, 2020).
26. S. Beery, *et al.*, Efficient Pipeline for Automating Species ID in new Camera Trap Projects. *Biodiversity Information Science and Standards* **3**, e37222 (2019).
27. J. A. Ahumada, *et al.*, Wildlife Insights: A Platform to Maximize the Potential of Camera Trap and Other Passive Sensor Wildlife Data for the Planet. *Environmental Conservation* **47**, 1–6 (2020).
28. T. M. Aide, *et al.*, Real-time bioacoustics monitoring and automated species identification. *PeerJ* **1**, e103 (2013).

519 **Supplementary Information for:**

520

521 **High performance machine learning models can fully automate labeling of camera trap images**  
522 **for ecological analyses**

523

524 Robin Whytock<sup>1,2\*†</sup>, Jędrzej Świeżewski<sup>3†</sup>, Joeri A. Zwerts<sup>4</sup>, Tadeusz Bara-Słupski<sup>4</sup>, Aurélie Flore  
525 Koumba Pambo<sup>2</sup>, Marek Rogala<sup>3</sup>, Laila Bahaa-el-din<sup>5</sup>, Kelly Boeke<sup>6,7</sup>, Stephanie Brittain<sup>8,9</sup>, Anabelle  
526 W. Cardoso<sup>10</sup>, Philipp Henschel<sup>11,12</sup>, David Lehmann<sup>2,1</sup>, Brice Momboua<sup>2</sup>, Cisquet Hector Ror Kiebou  
527 Opepa<sup>13</sup>, Christopher Orbell<sup>11,1</sup>, Ross T. Pitman<sup>11</sup>, Hugh S. Robinson<sup>11,14</sup>, Katharine A. Abernethy<sup>1,12</sup>

528 † These authors contributed equally to the manuscript.

529 **\*Corresponding author:** Robin C. Whytock, [robbie.whytock1@stir.ac.uk](mailto:robbie.whytock1@stir.ac.uk)

530 Paste manuscript title here

531 <sup>1</sup> Faculty of Natural Sciences, University of Stirling, FK9 4LA, UK

532 <sup>2</sup> Agence Nationale des Parcs Nationaux, Libreville, Gabon

533 <sup>3</sup> Appsilon AI for Good, Warsaw, Poland

534 <sup>4</sup> Utrecht University, Heidelberglaan 8, 3584 CS Utrecht, The Netherlands

535 <sup>5</sup> School of Life Sciences, University of KwaZulu-Natal, South Africa

536 <sup>6</sup> Program for the Sustainable Management of Natural Resources, South West Region, Buea, Cameroon

537 <sup>7</sup> Center for Tropical Forest Science, Smithsonian Tropical Research Institute, Balboa, Ancon,  
538 Republic of Panama

539 <sup>8</sup> The Interdisciplinary Centre for Conservation Science, Department of Zoology, University of Oxford,  
540 11a Mansfield Road, Oxford, OX1 3SZ

541 <sup>9</sup> The Institute of Zoology, Zoological Society of London, Outer Circle, London NW1 4RY

542 <sup>10</sup> Yale University, New Haven, CT 06520, USA

543 <sup>11</sup> Panthera, 8 West 40th Street, 18th Floor, New York, NY 10018, USA

544 <sup>12</sup> Institut de Recherche en Ecologie Tropicale, CENAREST, BP 842 Libreville, Gabon

545 <sup>13</sup> Wildlife Conservation Society, Republic of the Congo

546 <sup>14</sup> Wildlife Biology Program, W.A. Franke College of Forestry and Conservation, University of  
547 Montana, Natural Sciences Room 205, Missoula, Montana, 59812, USA

548

549 **This PDF file includes:**

550 Tables S1 to S4

551 Figures S1 to S9

552

553 **Table S1.** Species taxonomy, label descriptions and justification for species/class groups

| <b>Species class</b>   | <b>Scientific name</b>         | <b>Justification</b>                                                                  |
|------------------------|--------------------------------|---------------------------------------------------------------------------------------|
| Civet_African_Palm     | <i>Nandinia binotata</i>       | -                                                                                     |
| Gorilla                | <i>Gorilla gorilla gorilla</i> | -                                                                                     |
| Rail_Nkulengu          | <i>Himantornis haematopus</i>  | -                                                                                     |
| Guineafowl_Crested     | <i>Guttera pucherani</i>       | -                                                                                     |
| Mandrillus             | <i>Mandrillus sphinx</i>       | -                                                                                     |
| Blank                  |                                | No animal or human                                                                    |
| Buffalo_African        | <i>Cyncerus cafer nanus</i>    | -                                                                                     |
| Bird                   |                                | Any other bird                                                                        |
| Chevrotain_Water       | <i>Hymenoschus aquaticus</i>   | -                                                                                     |
| Guineafowl_Black       | <i>Agelastes niger</i>         | -                                                                                     |
| Cat_Golden             | <i>Caracal aurata</i>          | -                                                                                     |
| Pangolin               |                                | Identifies any pangolin but trained mainly on <i>Smutsia gigantea</i>                 |
| Duiker_Yellow_Backed   | <i>Cephalophus silvicultor</i> | -                                                                                     |
| Human                  | <i>Homo sapiens</i>            | -                                                                                     |
| Chimpanzee             | <i>Pan troglodytes</i>         | -                                                                                     |
| Monkey                 |                                | Any guenon, colobus or mangabey                                                       |
| Mongoose               |                                | Marsh mongoose <i>Atilax paludinosus</i> or long-nosed mongoose <i>Herpestes naso</i> |
| Rat_Giant              | <i>Cricetomys emini</i>        | -                                                                                     |
| Duiker_Red             | <i>Cephalophus</i> sp.         | Any of the red <i>Cephalophus</i> sp. duikers                                         |
| Duiker_Blue            | <i>Philantomba monticola</i>   | -                                                                                     |
| Hog_Red_River          | <i>Potamochoerus porcus</i>    | -                                                                                     |
| Squirrel               |                                | Any squirrel but most training data are <i>Protoxerus stangeri</i>                    |
| Leopard_African        | <i>Panthera pardus</i>         | -                                                                                     |
| Elephant_African       | <i>Loxodonta cyclotis</i>      | -                                                                                     |
| Porcupine_Brush_Tailed | <i>Atherurus africanus</i>     | -                                                                                     |
| Genet                  | <i>Genetta</i> sp.             | Most training data are <i>Genetta servalina</i>                                       |
| Mongoose_Black_Footed  | <i>Bdeogale nigripes</i>       | -                                                                                     |

554

555

556 **Table S2.** Measures of precision, accuracy and prevalence (%s) for the 27 species/groups (see Table S1  
557 for further details on species groups) in the out-of-sample test data.

| <b>Species class</b>   | <b>Precision</b> | <b>Recall</b> | <b>F1</b> | <b>Prevalence</b> | <b>Balanced Accuracy</b> |
|------------------------|------------------|---------------|-----------|-------------------|--------------------------|
| Bird                   | 6.4              | 35.6          | 10.9      | 0.3               | 67                       |
| Blank                  | 96.3             | 31.2          | 47.1      | 13.1              | 65.5                     |
| Buffalo_African        | 90.6             | 43.3          | 58.6      | 1.6               | 71.6                     |
| Cat_Golden             | 86.5             | 68.1          | 76.2      | 1.1               | 84                       |
| Chevrotain_Water       | 96.2             | 37.3          | 53.8      | 0.6               | 68.7                     |
| Chimpanzee             | 65.3             | 74.5          | 69.6      | 2.4               | 86.8                     |
| Civet_African_Palm     | 9.1              | 100           | 16.7      | < 0.1             | 100                      |
| Duiker_Blue            | 73.1             | 91.3          | 81.2      | 14.9              | 92.7                     |
| Duiker_Red             | 87.5             | 91.8          | 89.6      | 26                | 93.6                     |
| Duiker_Yellow_Backed   | 88.7             | 71.2          | 79        | 2.9               | 85.5                     |
| Elephant_African       | 83               | 95            | 88.6      | 15.9              | 95.6                     |
| Genet                  | 87.3             | 93.8          | 90.4      | 0.7               | 96.8                     |
| Gorilla                | 50               | 15.7          | 23.9      | 0.8               | 57.8                     |
| Guineafowl_Black       | 22.1             | 60.4          | 32.3      | 0.2               | 80                       |
| Guineafowl_Crested     | 100              | 16.1          | 27.8      | 0.1               | 58.1                     |
| Hog_Red_River          | 89.9             | 89.6          | 89.8      | 5.9               | 94.5                     |
| Human                  | 51.5             | 79.9          | 62.6      | 3.6               | 88.6                     |
| Leopard_African        | 87               | 85.9          | 86.4      | 2                 | 92.8                     |
| Mandrillus             | 73.5             | 26.1          | 38.6      | 2.7               | 62.9                     |
| Mongoose               | 48.2             | 80.4          | 60.3      | 0.4               | 90                       |
| Mongoose_Black_Footed  | 72.5             | 64.4          | 68.2      | 0.2               | 82.2                     |
| Monkey                 | 59.9             | 81            | 68.9      | 2.9               | 89.7                     |
| Pangolin               | 76.7             | 62.2          | 68.7      | 0.2               | 81.1                     |
| Porcupine_Brush_Tailed | 86.6             | 83.3          | 84.9      | 0.6               | 91.6                     |
| Rail_Nkulengu          | 0                | 0             | 0         | 0                 | 50                       |
| Rat_Giant              | 39               | 88.5          | 54.1      | 0.1               | 94.2                     |
| Squirrel               | 59.9             | 78.2          | 67.8      | 1                 | 88.8                     |

558

559

560 **Table S3.** Precision, recall, F1 score and prevalence (%) for the 27 species/groups (see Table S1 for  
 561 further details on species groups) in the out-of-sample test data at all thresholds used (10 – 90% confi-  
 562 dence).

| Species class          | Threshold | Precision | Recall | F1    | Prevalence | Balanced Accuracy |
|------------------------|-----------|-----------|--------|-------|------------|-------------------|
| Bird                   | 10        | 0.064     | 0.356  | 0.109 | 0.003      | 0.670             |
| Blank                  | 10        | 0.963     | 0.312  | 0.471 | 0.131      | 0.655             |
| Buffalo_African        | 10        | 0.906     | 0.433  | 0.586 | 0.016      | 0.716             |
| Cat_Golden             | 10        | 0.865     | 0.681  | 0.762 | 0.011      | 0.840             |
| Chevrotain_Water       | 10        | 0.962     | 0.373  | 0.538 | 0.006      | 0.687             |
| Chimpanzee             | 10        | 0.653     | 0.745  | 0.696 | 0.024      | 0.868             |
| Civet_African_Palm     | 10        | 0.091     | 1.000  | 0.167 | 0.000      | 1.000             |
| Duiker_Blue            | 10        | 0.731     | 0.913  | 0.812 | 0.149      | 0.927             |
| Duiker_Red             | 10        | 0.875     | 0.918  | 0.896 | 0.260      | 0.936             |
| Duiker_Yellow_Backed   | 10        | 0.887     | 0.712  | 0.790 | 0.029      | 0.855             |
| Elephant_African       | 10        | 0.830     | 0.950  | 0.886 | 0.159      | 0.956             |
| Genet                  | 10        | 0.873     | 0.938  | 0.904 | 0.007      | 0.968             |
| Gorilla                | 10        | 0.500     | 0.157  | 0.239 | 0.008      | 0.578             |
| Guineafowl_Black       | 10        | 0.221     | 0.604  | 0.323 | 0.002      | 0.800             |
| Guineafowl_Crested     | 10        | 1.000     | 0.161  | 0.278 | 0.001      | 0.581             |
| Hog_Red_River          | 10        | 0.899     | 0.896  | 0.898 | 0.059      | 0.945             |
| Human                  | 10        | 0.515     | 0.799  | 0.626 | 0.036      | 0.886             |
| Leopard_African        | 10        | 0.870     | 0.859  | 0.864 | 0.020      | 0.928             |
| Mandrillus             | 10        | 0.735     | 0.261  | 0.386 | 0.027      | 0.629             |
| Mongoose               | 10        | 0.482     | 0.804  | 0.603 | 0.004      | 0.900             |
| Mongoose_Black_Footed  | 10        | 0.725     | 0.644  | 0.682 | 0.002      | 0.822             |
| Monkey                 | 10        | 0.599     | 0.810  | 0.689 | 0.029      | 0.897             |
| Pangolin               | 10        | 0.767     | 0.622  | 0.687 | 0.002      | 0.811             |
| Porcupine_Brush_Tailed | 10        | 0.866     | 0.833  | 0.849 | 0.006      | 0.916             |
| Rail_Nkulengu          | 10        | 0.000     | 0.000  | NA    | 0.000      | 0.500             |
| Rat_Giant              | 10        | 0.390     | 0.885  | 0.541 | 0.001      | 0.942             |
| Squirrel               | 10        | 0.599     | 0.782  | 0.678 | 0.010      | 0.888             |
| Bird                   | 20        | 0.063     | 0.352  | 0.107 | 0.003      | 0.668             |
| Blank                  | 20        | 0.966     | 0.316  | 0.476 | 0.128      | 0.657             |
| Buffalo_African        | 20        | 0.906     | 0.433  | 0.586 | 0.016      | 0.716             |
| Cat_Golden             | 20        | 0.865     | 0.688  | 0.767 | 0.011      | 0.844             |
| Chevrotain_Water       | 20        | 0.961     | 0.380  | 0.544 | 0.005      | 0.690             |
| Chimpanzee             | 20        | 0.659     | 0.745  | 0.699 | 0.024      | 0.868             |
| Civet_African_Palm     | 20        | 0.111     | 1.000  | 0.200 | 0.000      | 1.000             |
| Duiker_Blue            | 20        | 0.734     | 0.915  | 0.814 | 0.149      | 0.928             |
| Duiker_Red             | 20        | 0.877     | 0.919  | 0.898 | 0.261      | 0.937             |
| Duiker_Yellow_Backed   | 20        | 0.888     | 0.714  | 0.792 | 0.029      | 0.856             |
| Elephant_African       | 20        | 0.830     | 0.951  | 0.886 | 0.160      | 0.957             |
| Genet                  | 20        | 0.893     | 0.938  | 0.915 | 0.007      | 0.969             |
| Gorilla                | 20        | 0.482     | 0.148  | 0.227 | 0.008      | 0.574             |
| Guineafowl_Black       | 20        | 0.225     | 0.604  | 0.328 | 0.002      | 0.800             |
| Guineafowl_Crested     | 20        | 1.000     | 0.161  | 0.278 | 0.001      | 0.581             |
| Hog_Red_River          | 20        | 0.900     | 0.896  | 0.898 | 0.059      | 0.945             |
| Human                  | 20        | 0.524     | 0.800  | 0.633 | 0.036      | 0.886             |
| Leopard_African        | 20        | 0.872     | 0.861  | 0.866 | 0.020      | 0.929             |
| Mandrillus             | 20        | 0.735     | 0.263  | 0.388 | 0.027      | 0.630             |
| Mongoose               | 20        | 0.516     | 0.804  | 0.628 | 0.004      | 0.900             |

| <b>Species class</b>   | <b>Threshold</b> | <b>Precision</b> | <b>Recall</b> | <b>F1</b> | <b>Prevalence</b> | <b>Balanced Accuracy</b> |
|------------------------|------------------|------------------|---------------|-----------|-------------------|--------------------------|
| Mongoose_Black_Footed  | 20               | 0.763            | 0.674         | 0.716     | 0.002             | 0.837                    |
| Monkey                 | 20               | 0.601            | 0.814         | 0.691     | 0.029             | 0.899                    |
| Pangolin               | 20               | 0.821            | 0.622         | 0.708     | 0.002             | 0.811                    |
| Porcupine_Brush_Tailed | 20               | 0.866            | 0.853         | 0.859     | 0.005             | 0.926                    |
| Rail_Nkulengu          | 20               | 0.000            | 0.000         | NA        | 0.000             | 0.500                    |
| Rat_Giant              | 20               | 0.386            | 0.880         | 0.537     | 0.001             | 0.939                    |
| Squirrel               | 20               | 0.608            | 0.782         | 0.684     | 0.010             | 0.888                    |
| Bird                   | 30               | 0.065            | 0.377         | 0.111     | 0.003             | 0.681                    |
| Blank                  | 30               | 0.968            | 0.329         | 0.491     | 0.112             | 0.664                    |
| Buffalo_African        | 30               | 0.911            | 0.446         | 0.599     | 0.016             | 0.722                    |
| Cat_Golden             | 30               | 0.885            | 0.708         | 0.787     | 0.011             | 0.853                    |
| Chevrotain_Water       | 30               | 0.980            | 0.403         | 0.571     | 0.005             | 0.702                    |
| Chimpanzee             | 30               | 0.683            | 0.762         | 0.720     | 0.024             | 0.876                    |
| Civet_African_Palm     | 30               | 0.200            | 1.000         | 0.333     | 0.000             | 1.000                    |
| Duiker_Blue            | 30               | 0.754            | 0.921         | 0.829     | 0.152             | 0.934                    |
| Duiker_Red             | 30               | 0.888            | 0.922         | 0.905     | 0.268             | 0.940                    |
| Duiker_Yellow_Backed   | 30               | 0.909            | 0.726         | 0.807     | 0.029             | 0.862                    |
| Elephant_African       | 30               | 0.840            | 0.955         | 0.894     | 0.164             | 0.960                    |
| Genet                  | 30               | 0.904            | 0.950         | 0.926     | 0.007             | 0.974                    |
| Gorilla                | 30               | 0.519            | 0.153         | 0.237     | 0.008             | 0.576                    |
| Guineafowl_Black       | 30               | 0.283            | 0.604         | 0.386     | 0.002             | 0.800                    |
| Guineafowl_Crested     | 30               | 1.000            | 0.161         | 0.278     | 0.001             | 0.581                    |
| Hog_Red_River          | 30               | 0.911            | 0.902         | 0.907     | 0.061             | 0.948                    |
| Human                  | 30               | 0.551            | 0.802         | 0.653     | 0.037             | 0.888                    |
| Leopard_African        | 30               | 0.887            | 0.872         | 0.879     | 0.020             | 0.935                    |
| Mandrillus             | 30               | 0.764            | 0.266         | 0.395     | 0.026             | 0.632                    |
| Mongoose               | 30               | 0.599            | 0.828         | 0.695     | 0.004             | 0.913                    |
| Mongoose_Black_Footed  | 30               | 0.763            | 0.829         | 0.795     | 0.002             | 0.914                    |
| Monkey                 | 30               | 0.612            | 0.831         | 0.705     | 0.029             | 0.908                    |
| Pangolin               | 30               | 0.815            | 0.667         | 0.733     | 0.001             | 0.833                    |
| Porcupine_Brush_Tailed | 30               | 0.858            | 0.858         | 0.858     | 0.005             | 0.929                    |
| Rail_Nkulengu          | 30               | 0.000            | 0.000         | NA        | 0.000             | 0.500                    |
| Rat_Giant              | 30               | 0.449            | 0.917         | 0.603     | 0.001             | 0.958                    |
| Squirrel               | 30               | 0.645            | 0.801         | 0.715     | 0.010             | 0.898                    |
| Bird                   | 40               | 0.078            | 0.423         | 0.132     | 0.002             | 0.706                    |
| Blank                  | 40               | 0.976            | 0.352         | 0.518     | 0.090             | 0.676                    |
| Buffalo_African        | 40               | 0.929            | 0.473         | 0.627     | 0.015             | 0.736                    |
| Cat_Golden             | 40               | 0.905            | 0.722         | 0.803     | 0.011             | 0.860                    |
| Chevrotain_Water       | 40               | 0.977            | 0.452         | 0.618     | 0.004             | 0.726                    |
| Chimpanzee             | 40               | 0.725            | 0.788         | 0.755     | 0.024             | 0.890                    |
| Civet_African_Palm     | 40               | 0.200            | 1.000         | 0.333     | 0.000             | 1.000                    |
| Duiker_Blue            | 40               | 0.791            | 0.934         | 0.857     | 0.157             | 0.944                    |
| Duiker_Red             | 40               | 0.904            | 0.930         | 0.917     | 0.279             | 0.946                    |
| Duiker_Yellow_Backed   | 40               | 0.924            | 0.751         | 0.829     | 0.030             | 0.875                    |
| Elephant_African       | 40               | 0.860            | 0.962         | 0.908     | 0.170             | 0.965                    |
| Genet                  | 40               | 0.921            | 0.950         | 0.935     | 0.007             | 0.975                    |
| Gorilla                | 40               | 0.528            | 0.119         | 0.195     | 0.007             | 0.559                    |
| Guineafowl_Black       | 40               | 0.375            | 0.600         | 0.462     | 0.002             | 0.799                    |
| Guineafowl_Crested     | 40               | 1.000            | 0.161         | 0.278     | 0.001             | 0.581                    |
| Hog_Red_River          | 40               | 0.930            | 0.911         | 0.920     | 0.063             | 0.953                    |
| Human                  | 40               | 0.593            | 0.811         | 0.685     | 0.038             | 0.895                    |
| Leopard_African        | 40               | 0.897            | 0.903         | 0.900     | 0.020             | 0.951                    |
| Mandrillus             | 40               | 0.795            | 0.288         | 0.422     | 0.025             | 0.643                    |
| Mongoose               | 40               | 0.704            | 0.835         | 0.764     | 0.004             | 0.917                    |



| <b>Species class</b>   | <b>Threshold</b> | <b>Precision</b> | <b>Recall</b> | <b>F1</b> | <b>Prevalence</b> | <b>Balanced Accuracy</b> |
|------------------------|------------------|------------------|---------------|-----------|-------------------|--------------------------|
| Mongoose_Black_Footed  | 40               | 0.800            | 0.903         | 0.848     | 0.001             | 0.951                    |
| Monkey                 | 40               | 0.632            | 0.856         | 0.727     | 0.029             | 0.920                    |
| Pangolin               | 40               | 0.880            | 0.733         | 0.800     | 0.001             | 0.867                    |
| Porcupine_Brush_Tailed | 40               | 0.888            | 0.904         | 0.896     | 0.005             | 0.951                    |
| Rail_Nkulengu          | 40               | 0.000            | 0.000         | NA        | 0.000             | 0.500                    |
| Rat_Giant              | 40               | 0.537            | 0.917         | 0.677     | 0.001             | 0.958                    |
| Squirrel               | 40               | 0.715            | 0.843         | 0.774     | 0.010             | 0.920                    |
| Bird                   | 50               | 0.084            | 0.450         | 0.142     | 0.002             | 0.720                    |
| Blank                  | 50               | 0.981            | 0.378         | 0.546     | 0.072             | 0.689                    |
| Buffalo_African        | 50               | 0.938            | 0.503         | 0.655     | 0.014             | 0.751                    |
| Cat_Golden             | 50               | 0.923            | 0.741         | 0.822     | 0.011             | 0.870                    |
| Chevrotain_Water       | 50               | 0.974            | 0.500         | 0.661     | 0.004             | 0.750                    |
| Chimpanzee             | 50               | 0.753            | 0.824         | 0.787     | 0.024             | 0.909                    |
| Civet_African_Palm     | 50               | 0.500            | 1.000         | 0.667     | 0.000             | 1.000                    |
| Duiker_Blue            | 50               | 0.825            | 0.945         | 0.881     | 0.162             | 0.953                    |
| Duiker_Red             | 50               | 0.920            | 0.939         | 0.930     | 0.288             | 0.953                    |
| Duiker_Yellow_Backed   | 50               | 0.942            | 0.773         | 0.849     | 0.029             | 0.886                    |
| Elephant_African       | 50               | 0.879            | 0.968         | 0.921     | 0.177             | 0.969                    |
| Genet                  | 50               | 0.932            | 0.962         | 0.947     | 0.008             | 0.981                    |
| Gorilla                | 50               | 0.583            | 0.107         | 0.181     | 0.006             | 0.553                    |
| Guineafowl_Black       | 50               | 0.492            | 0.638         | 0.556     | 0.002             | 0.818                    |
| Guineafowl_Crested     | 50               | 1.000            | 0.138         | 0.242     | 0.001             | 0.569                    |
| Hog_Red_River          | 50               | 0.946            | 0.922         | 0.934     | 0.064             | 0.959                    |
| Human                  | 50               | 0.646            | 0.827         | 0.725     | 0.039             | 0.904                    |
| Leopard_African        | 50               | 0.902            | 0.921         | 0.912     | 0.021             | 0.959                    |
| Mandrillus             | 50               | 0.816            | 0.292         | 0.430     | 0.023             | 0.645                    |
| Mongoose               | 50               | 0.775            | 0.868         | 0.819     | 0.004             | 0.934                    |
| Mongoose_Black_Footed  | 50               | 0.903            | 0.933         | 0.918     | 0.001             | 0.967                    |
| Monkey                 | 50               | 0.654            | 0.879         | 0.750     | 0.029             | 0.932                    |
| Pangolin               | 50               | 0.913            | 0.724         | 0.808     | 0.001             | 0.862                    |
| Porcupine_Brush_Tailed | 50               | 0.902            | 0.953         | 0.927     | 0.005             | 0.976                    |
| Rail_Nkulengu          | 50               | 0.000            | 0.000         | NA        | 0.000             | 0.500                    |
| Rat_Giant              | 50               | 0.625            | 0.909         | 0.741     | 0.001             | 0.954                    |
| Squirrel               | 50               | 0.758            | 0.888         | 0.818     | 0.010             | 0.943                    |
| Bird                   | 60               | 0.103            | 0.552         | 0.174     | 0.002             | 0.772                    |
| Blank                  | 60               | 0.985            | 0.399         | 0.568     | 0.052             | 0.699                    |
| Buffalo_African        | 60               | 0.957            | 0.545         | 0.694     | 0.013             | 0.772                    |
| Cat_Golden             | 60               | 0.935            | 0.768         | 0.844     | 0.011             | 0.884                    |
| Chevrotain_Water       | 60               | 0.970            | 0.582         | 0.727     | 0.003             | 0.791                    |
| Chimpanzee             | 60               | 0.809            | 0.848         | 0.828     | 0.023             | 0.921                    |
| Civet_African_Palm     | 60               | 0.500            | 1.000         | 0.667     | 0.000             | 1.000                    |
| Duiker_Blue            | 60               | 0.870            | 0.960         | 0.912     | 0.169             | 0.965                    |
| Duiker_Red             | 60               | 0.943            | 0.952         | 0.948     | 0.298             | 0.964                    |
| Duiker_Yellow_Backed   | 60               | 0.962            | 0.802         | 0.875     | 0.029             | 0.901                    |
| Elephant_African       | 60               | 0.897            | 0.975         | 0.934     | 0.186             | 0.975                    |
| Genet                  | 60               | 0.943            | 0.980         | 0.961     | 0.008             | 0.990                    |
| Gorilla                | 60               | 0.583            | 0.065         | 0.118     | 0.006             | 0.533                    |
| Guineafowl_Black       | 60               | 0.614            | 0.711         | 0.659     | 0.002             | 0.855                    |
| Guineafowl_Crested     | 60               | 1.000            | 0.087         | 0.160     | 0.001             | 0.543                    |
| Hog_Red_River          | 60               | 0.962            | 0.942         | 0.952     | 0.065             | 0.970                    |
| Human                  | 60               | 0.714            | 0.850         | 0.777     | 0.039             | 0.918                    |
| Leopard_African        | 60               | 0.916            | 0.945         | 0.930     | 0.022             | 0.971                    |
| Mandrillus             | 60               | 0.809            | 0.276         | 0.411     | 0.021             | 0.637                    |
| Mongoose               | 60               | 0.794            | 0.895         | 0.842     | 0.004             | 0.947                    |



| <b>Species class</b>   | <b>Threshold</b> | <b>Precision</b> | <b>Recall</b> | <b>F1</b> | <b>Prevalence</b> | <b>Balanced Accuracy</b> |
|------------------------|------------------|------------------|---------------|-----------|-------------------|--------------------------|
| Mongoose_Black_Footed  | 60               | 0.900            | 1.000         | 0.947     | 0.001             | 1.000                    |
| Monkey                 | 60               | 0.680            | 0.898         | 0.774     | 0.029             | 0.942                    |
| Pangolin               | 60               | 0.905            | 0.731         | 0.809     | 0.001             | 0.865                    |
| Porcupine_Brush_Tailed | 60               | 0.923            | 0.970         | 0.946     | 0.005             | 0.985                    |
| Rail_Nkulengu          | 60               | 0.000            | 0.000         | NA        | 0.000             | 0.500                    |
| Rat_Giant              | 60               | 0.633            | 0.950         | 0.760     | 0.001             | 0.975                    |
| Squirrel               | 60               | 0.810            | 0.938         | 0.869     | 0.009             | 0.968                    |
| Bird                   | 70               | 0.112            | 0.600         | 0.189     | 0.001             | 0.797                    |
| Blank                  | 70               | 0.981            | 0.403         | 0.571     | 0.036             | 0.701                    |
| Buffalo_African        | 70               | 0.975            | 0.557         | 0.709     | 0.012             | 0.778                    |
| Cat_Golden             | 70               | 0.960            | 0.780         | 0.861     | 0.010             | 0.890                    |
| Chevrotain_Water       | 70               | 1.000            | 0.674         | 0.806     | 0.002             | 0.837                    |
| Chimpanzee             | 70               | 0.835            | 0.884         | 0.859     | 0.022             | 0.940                    |
| Civet_African_Palm     | 70               | NA               | NA            | NA        | 0.000             | NA                       |
| Duiker_Blue            | 70               | 0.904            | 0.970         | 0.936     | 0.176             | 0.974                    |
| Duiker_Red             | 70               | 0.959            | 0.965         | 0.962     | 0.308             | 0.973                    |
| Duiker_Yellow_Backed   | 70               | 0.975            | 0.838         | 0.902     | 0.029             | 0.919                    |
| Elephant_African       | 70               | 0.919            | 0.984         | 0.951     | 0.193             | 0.982                    |
| Genet                  | 70               | 0.953            | 0.993         | 0.972     | 0.008             | 0.996                    |
| Gorilla                | 70               | 0.000            | 0.000         | NA        | 0.004             | 0.500                    |
| Guineafowl_Black       | 70               | 0.706            | 0.727         | 0.716     | 0.002             | 0.863                    |
| Guineafowl_Crested     | 70               | 1.000            | 0.053         | 0.100     | 0.001             | 0.526                    |
| Hog_Red_River          | 70               | 0.970            | 0.957         | 0.963     | 0.065             | 0.977                    |
| Human                  | 70               | 0.784            | 0.874         | 0.826     | 0.040             | 0.932                    |
| Leopard_African        | 70               | 0.928            | 0.960         | 0.944     | 0.022             | 0.979                    |
| Mandrillus             | 70               | 0.839            | 0.290         | 0.431     | 0.018             | 0.645                    |
| Mongoose               | 70               | 0.835            | 0.910         | 0.871     | 0.004             | 0.955                    |
| Mongoose_Black_Footed  | 70               | 0.929            | 1.000         | 0.963     | 0.001             | 1.000                    |
| Monkey                 | 70               | 0.707            | 0.920         | 0.800     | 0.029             | 0.954                    |
| Pangolin               | 70               | 0.941            | 0.800         | 0.865     | 0.001             | 0.900                    |
| Porcupine_Brush_Tailed | 70               | 0.939            | 0.989         | 0.963     | 0.005             | 0.994                    |
| Rail_Nkulengu          | 70               | 0.000            | 0.000         | NA        | 0.000             | 0.500                    |
| Rat_Giant              | 70               | 0.682            | 0.938         | 0.789     | 0.001             | 0.969                    |
| Squirrel               | 70               | 0.859            | 0.958         | 0.906     | 0.009             | 0.978                    |
| Bird                   | 80               | 0.151            | 0.786         | 0.253     | 0.001             | 0.891                    |
| Blank                  | 80               | 0.986            | 0.363         | 0.530     | 0.023             | 0.681                    |
| Buffalo_African        | 80               | 1.000            | 0.596         | 0.747     | 0.010             | 0.798                    |
| Cat_Golden             | 80               | 0.962            | 0.839         | 0.896     | 0.009             | 0.919                    |
| Chevrotain_Water       | 80               | 1.000            | 0.750         | 0.857     | 0.002             | 0.875                    |
| Chimpanzee             | 80               | 0.875            | 0.919         | 0.897     | 0.019             | 0.958                    |
| Civet_African_Palm     | 80               | NA               | NA            | NA        | 0.000             | NA                       |
| Duiker_Blue            | 80               | 0.932            | 0.981         | 0.956     | 0.183             | 0.982                    |
| Duiker_Red             | 80               | 0.973            | 0.975         | 0.974     | 0.315             | 0.981                    |
| Duiker_Yellow_Backed   | 80               | 0.988            | 0.885         | 0.934     | 0.028             | 0.942                    |
| Elephant_African       | 80               | 0.940            | 0.991         | 0.965     | 0.203             | 0.987                    |
| Genet                  | 80               | 0.949            | 1.000         | 0.974     | 0.008             | 1.000                    |
| Gorilla                | 80               | 0.000            | 0.000         | NA        | 0.003             | 0.500                    |
| Guineafowl_Black       | 80               | 0.769            | 0.690         | 0.727     | 0.002             | 0.845                    |
| Guineafowl_Crested     | 80               | 1.000            | 0.067         | 0.125     | 0.001             | 0.533                    |
| Hog_Red_River          | 80               | 0.980            | 0.971         | 0.975     | 0.065             | 0.985                    |
| Human                  | 80               | 0.853            | 0.892         | 0.872     | 0.040             | 0.943                    |
| Leopard_African        | 80               | 0.952            | 0.974         | 0.963     | 0.023             | 0.987                    |
| Mandrillus             | 80               | 0.888            | 0.305         | 0.454     | 0.014             | 0.652                    |
| Mongoose               | 80               | 0.829            | 0.944         | 0.883     | 0.004             | 0.972                    |

| <b>Species class</b>   | <b>Threshold</b> | <b>Precision</b> | <b>Recall</b> | <b>F1</b> | <b>Prevalence</b> | <b>Balanced Accuracy</b> |
|------------------------|------------------|------------------|---------------|-----------|-------------------|--------------------------|
| Mongoose_Black_Footed  | 80               | 1.000            | 1.000         | 1.000     | 0.001             | 1.000                    |
| Monkey                 | 80               | 0.756            | 0.928         | 0.833     | 0.029             | 0.959                    |
| Pangolin               | 80               | 1.000            | 0.824         | 0.903     | 0.001             | 0.912                    |
| Porcupine_Brush_Tailed | 80               | 0.935            | 0.989         | 0.961     | 0.005             | 0.994                    |
| Rail_Nkulengu          | 80               | NA               | NA            | NA        | 0.000             | NA                       |
| Rat_Giant              | 80               | 0.737            | 0.933         | 0.824     | 0.001             | 0.967                    |
| Squirrel               | 80               | 0.879            | 0.979         | 0.926     | 0.008             | 0.989                    |
| Bird                   | 90               | 0.220            | 0.900         | 0.353     | 0.001             | 0.949                    |
| Blank                  | 90               | 1.000            | 0.320         | 0.484     | 0.011             | 0.660                    |
| Buffalo_African        | 90               | 1.000            | 0.647         | 0.785     | 0.008             | 0.823                    |
| Cat_Golden             | 90               | 0.980            | 0.897         | 0.937     | 0.007             | 0.949                    |
| Chevrotain_Water       | 90               | 1.000            | 0.833         | 0.909     | 0.001             | 0.917                    |
| Chimpanzee             | 90               | 0.914            | 0.922         | 0.918     | 0.016             | 0.960                    |
| Civet_African_Palm     | 90               | NA               | NA            | NA        | 0.000             | NA                       |
| Duiker_Blue            | 90               | 0.957            | 0.990         | 0.973     | 0.196             | 0.989                    |
| Duiker_Red             | 90               | 0.984            | 0.984         | 0.984     | 0.317             | 0.988                    |
| Duiker_Yellow_Backed   | 90               | 0.994            | 0.912         | 0.952     | 0.026             | 0.956                    |
| Elephant_African       | 90               | 0.961            | 0.994         | 0.977     | 0.218             | 0.991                    |
| Genet                  | 90               | 0.957            | 1.000         | 0.978     | 0.007             | 1.000                    |
| Gorilla                | 90               | NA               | 0.000         | NA        | 0.002             | 0.500                    |
| Guineafowl_Black       | 90               | 0.864            | 0.826         | 0.844     | 0.002             | 0.913                    |
| Guineafowl_Crested     | 90               | NA               | 0.000         | NA        | 0.001             | 0.500                    |
| Hog_Red_River          | 90               | 0.986            | 0.982         | 0.984     | 0.063             | 0.990                    |
| Human                  | 90               | 0.918            | 0.923         | 0.920     | 0.040             | 0.960                    |
| Leopard_African        | 90               | 0.973            | 0.979         | 0.976     | 0.025             | 0.989                    |
| Mandrillus             | 90               | 0.900            | 0.298         | 0.448     | 0.010             | 0.649                    |
| Mongoose               | 90               | 0.855            | 0.967         | 0.908     | 0.004             | 0.983                    |
| Mongoose_Black_Footed  | 90               | 1.000            | 1.000         | 1.000     | 0.001             | 1.000                    |
| Monkey                 | 90               | 0.811            | 0.952         | 0.876     | 0.028             | 0.973                    |
| Pangolin               | 90               | 1.000            | 0.813         | 0.897     | 0.001             | 0.906                    |
| Porcupine_Brush_Tailed | 90               | 0.934            | 1.000         | 0.966     | 0.005             | 1.000                    |
| Rail_Nkulengu          | 90               | NA               | NA            | NA        | 0.000             | NA                       |
| Rat_Giant              | 90               | 0.846            | 0.917         | 0.880     | 0.001             | 0.958                    |
| Squirrel               | 90               | 0.938            | 0.981         | 0.959     | 0.007             | 0.990                    |

563

564

565 **Table S4.** Difference in proportion of day (24 h) active for each species and threshold combination  
566 showing standard error (SE), Wald test statistic (W) and p value (p).

| <b>Species</b>   | <b>Threshold</b> | <b>Difference</b> | <b>SE</b> | <b>W</b> | <b>p</b> |
|------------------|------------------|-------------------|-----------|----------|----------|
| Elephant_African | 0.00             | 0.08              | 0.03      | 5.97     | 0.01     |
| Leopard_African  | 0.00             | 0.16              | 0.08      | 3.99     | 0.05     |
| Cat_Golden       | 0.00             | 0.06              | 0.09      | 0.42     | 0.52     |
| Chimpanzee       | 0.00             | 0.05              | 0.03      | 2.92     | 0.09     |
| Elephant_African | 0.10             | 0.08              | 0.04      | 5.47     | 0.02     |
| Leopard_African  | 0.10             | 0.16              | 0.08      | 4.26     | 0.04     |
| Cat_Golden       | 0.10             | 0.06              | 0.09      | 0.45     | 0.50     |
| Chimpanzee       | 0.10             | 0.05              | 0.03      | 2.71     | 0.10     |
| Elephant_African | 0.20             | 0.08              | 0.03      | 6.04     | 0.01     |
| Leopard_African  | 0.20             | 0.16              | 0.08      | 4.15     | 0.04     |
| Cat_Golden       | 0.20             | 0.06              | 0.09      | 0.38     | 0.54     |
| Chimpanzee       | 0.20             | 0.04              | 0.03      | 2.33     | 0.13     |
| Elephant_African | 0.30             | 0.08              | 0.03      | 6.44     | 0.01     |
| Leopard_African  | 0.30             | 0.16              | 0.08      | 4.53     | 0.03     |
| Cat_Golden       | 0.30             | 0.04              | 0.09      | 0.20     | 0.66     |
| Chimpanzee       | 0.30             | 0.04              | 0.03      | 2.07     | 0.15     |
| Elephant_African | 0.40             | 0.07              | 0.03      | 4.15     | 0.04     |
| Leopard_African  | 0.40             | 0.16              | 0.08      | 4.08     | 0.04     |
| Cat_Golden       | 0.40             | 0.08              | 0.10      | 0.67     | 0.41     |
| Chimpanzee       | 0.40             | 0.04              | 0.03      | 1.91     | 0.17     |
| Elephant_African | 0.50             | 0.05              | 0.03      | 2.64     | 0.10     |
| Leopard_African  | 0.50             | 0.17              | 0.08      | 4.48     | 0.03     |
| Cat_Golden       | 0.50             | 0.09              | 0.09      | 0.96     | 0.33     |
| Chimpanzee       | 0.50             | 0.04              | 0.03      | 1.77     | 0.18     |
| Elephant_African | 0.60             | 0.04              | 0.03      | 1.64     | 0.20     |
| Leopard_African  | 0.60             | 0.15              | 0.08      | 3.53     | 0.06     |
| Cat_Golden       | 0.60             | 0.06              | 0.10      | 0.44     | 0.50     |
| Chimpanzee       | 0.60             | 0.04              | 0.03      | 1.52     | 0.22     |
| Elephant_African | 0.70             | 0.04              | 0.03      | 1.21     | 0.27     |
| Leopard_African  | 0.70             | 0.15              | 0.08      | 3.08     | 0.08     |
| Cat_Golden       | 0.70             | 0.10              | 0.10      | 1.00     | 0.32     |
| Chimpanzee       | 0.70             | 0.03              | 0.03      | 1.36     | 0.24     |
| Elephant_African | 0.80             | 0.03              | 0.03      | 0.69     | 0.41     |
| Leopard_African  | 0.80             | 0.16              | 0.08      | 3.86     | 0.05     |
| Cat_Golden       | 0.80             | 0.15              | 0.10      | 2.14     | 0.14     |
| Chimpanzee       | 0.80             | 0.03              | 0.03      | 0.93     | 0.33     |
| Elephant_African | 0.90             | 0.02              | 0.03      | 0.57     | 0.45     |
| Leopard_African  | 0.90             | 0.16              | 0.08      | 4.51     | 0.03     |
| Cat_Golden       | 0.90             | 0.16              | 0.10      | 2.70     | 0.10     |
| Chimpanzee       | 0.90             | 0.03              | 0.03      | 1.09     | 0.30     |

567

568

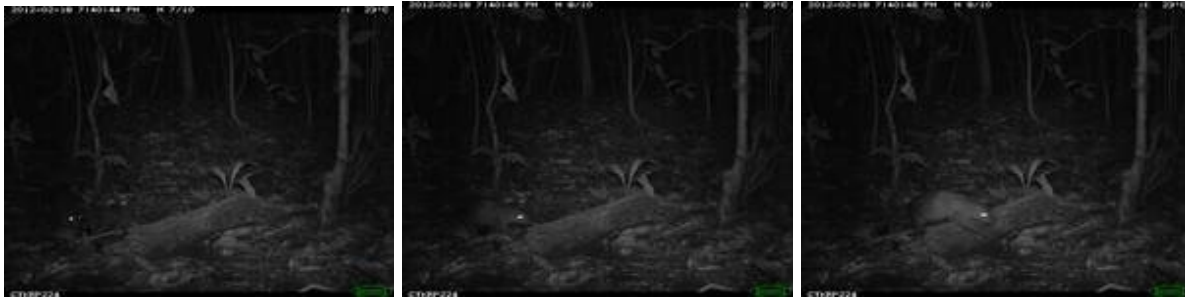

569

570 **Figure S1.** Three example photos taken from a burst of 10 images, showing a porcupine *Atherurus*

571 *africanus* walking in front of the camera.

572

573

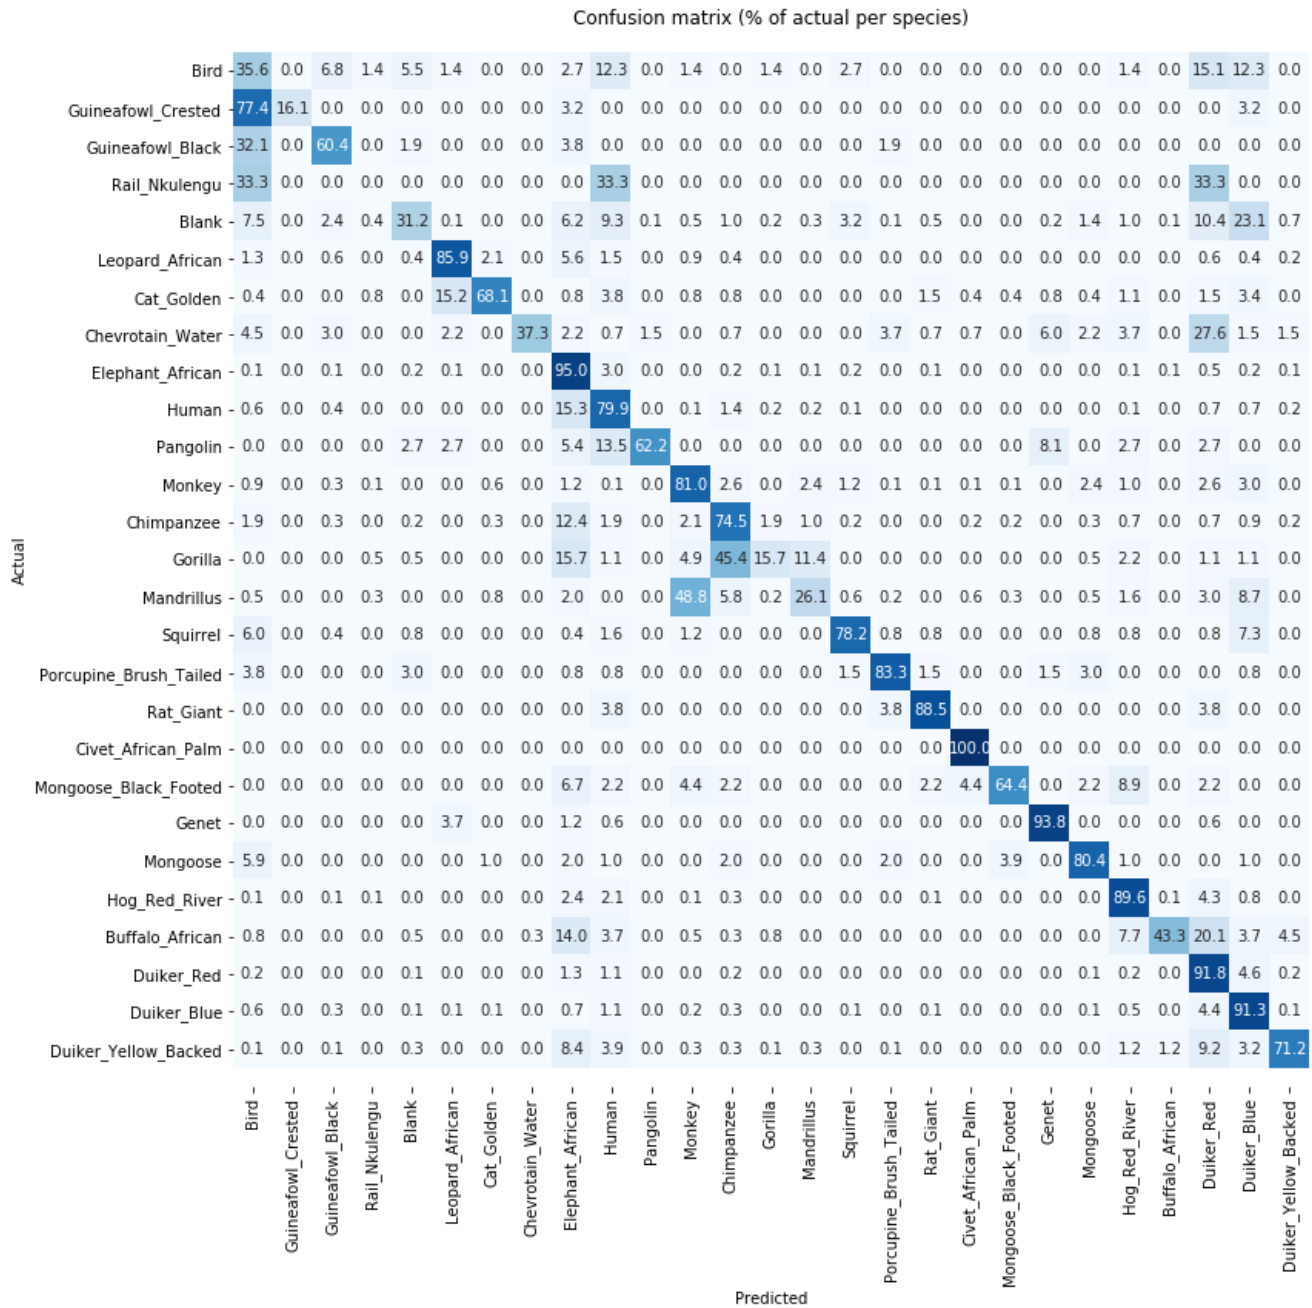

574

575 **Figure S2.** Confusion matrix showing model performance on out of sample test data (each row is  
 576 normalized independently). Figure S7 shows the confusion matrix with absolute numbers.

577

578

579

580

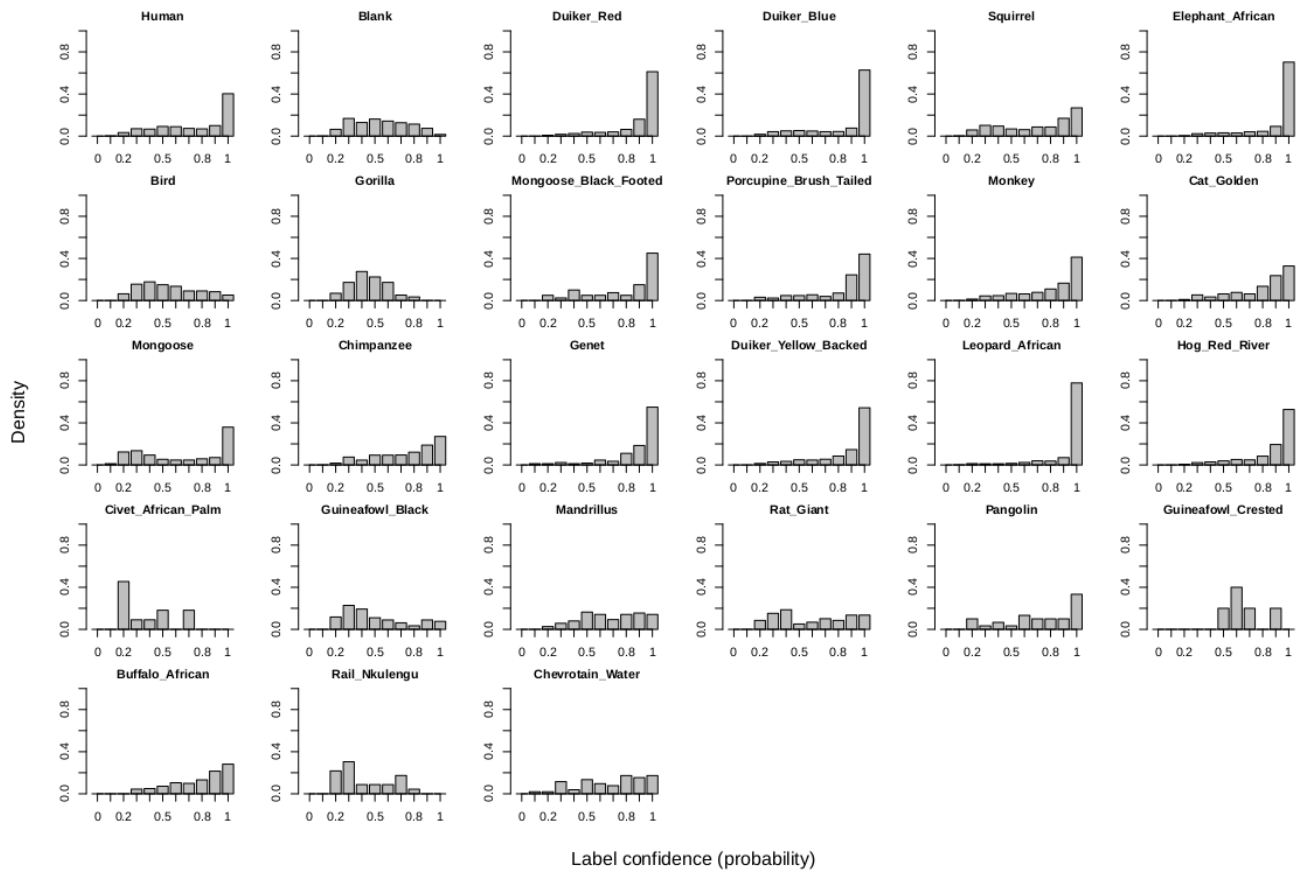

584

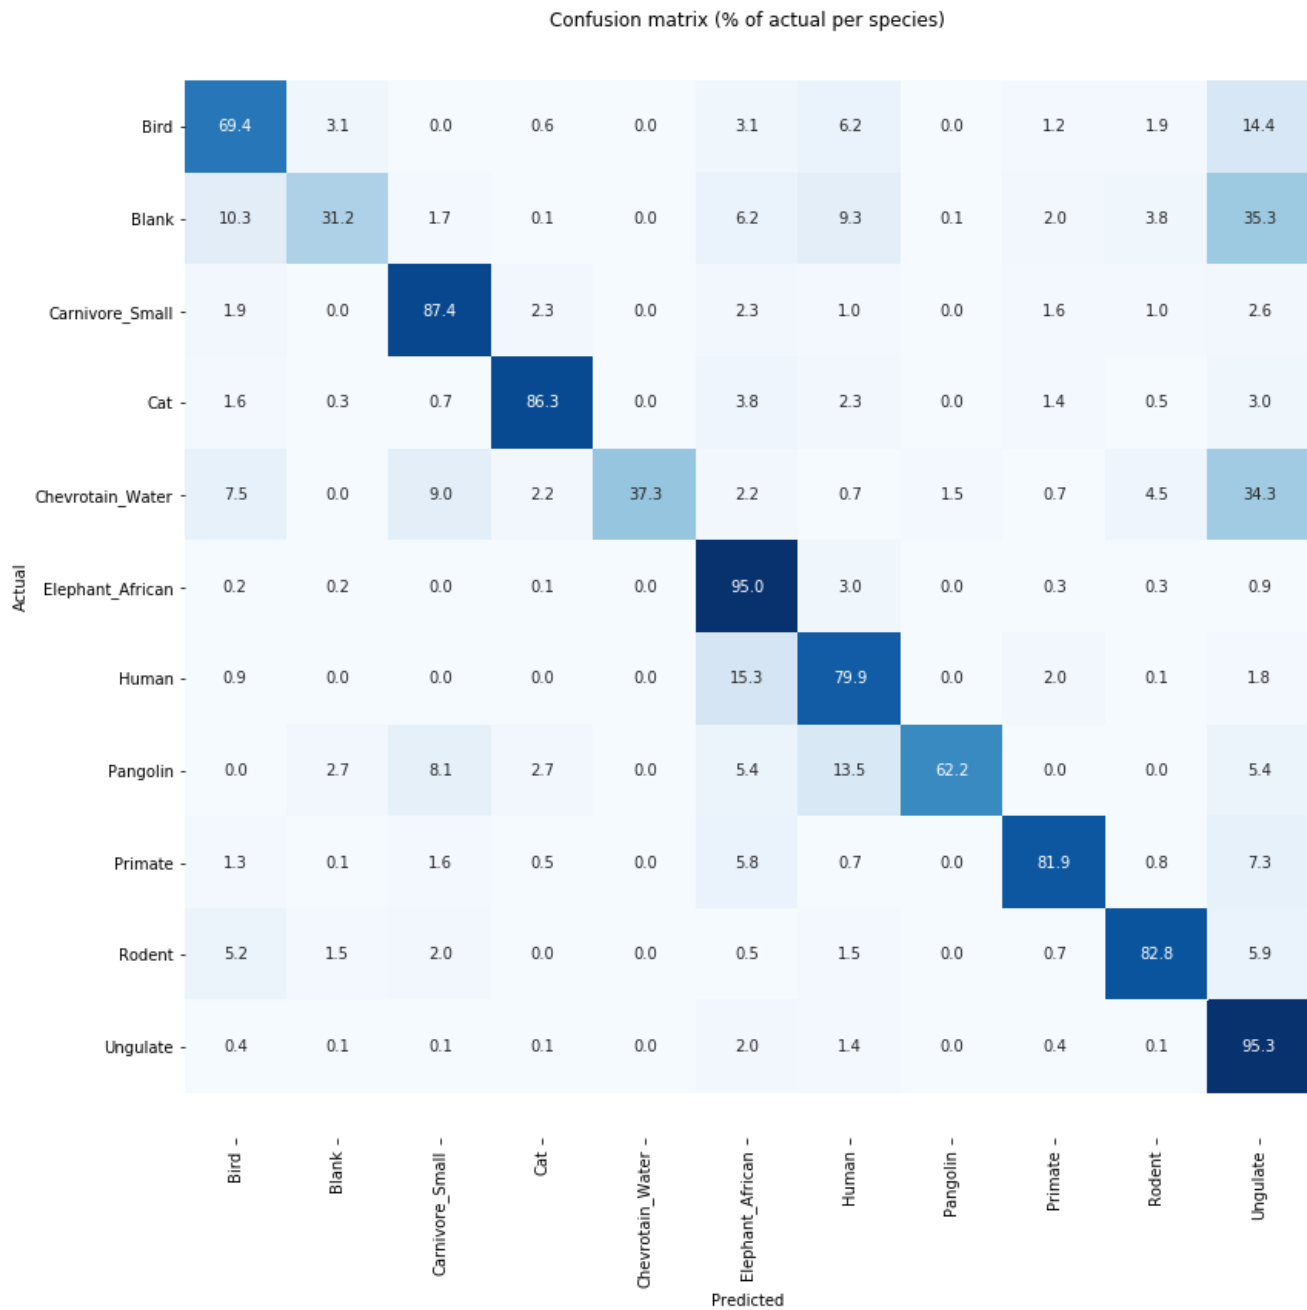

585

586 **Figure S4.** Confusion matrix showing model performance for an aggregated set of 11 classes.

587

588

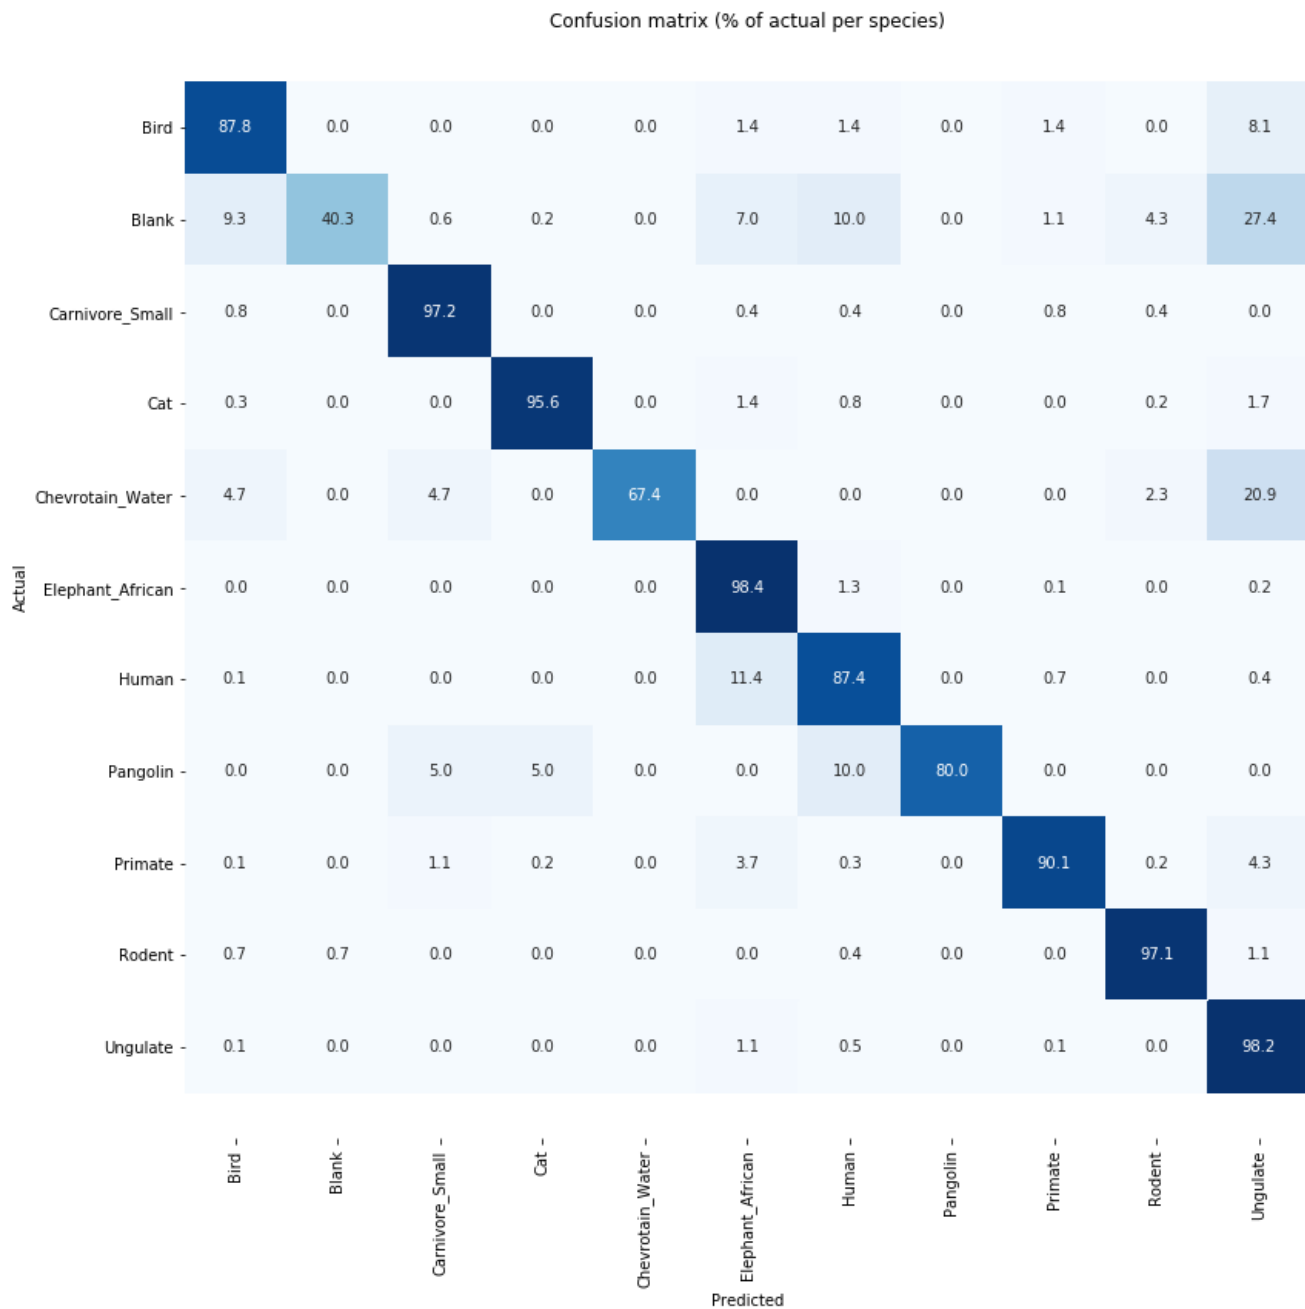

589

590 **Figure S5.** Confusion matrix showing model performance for an aggregated set of 11 classes after  
 591 removing labels with a predicted confidence < 70%

592







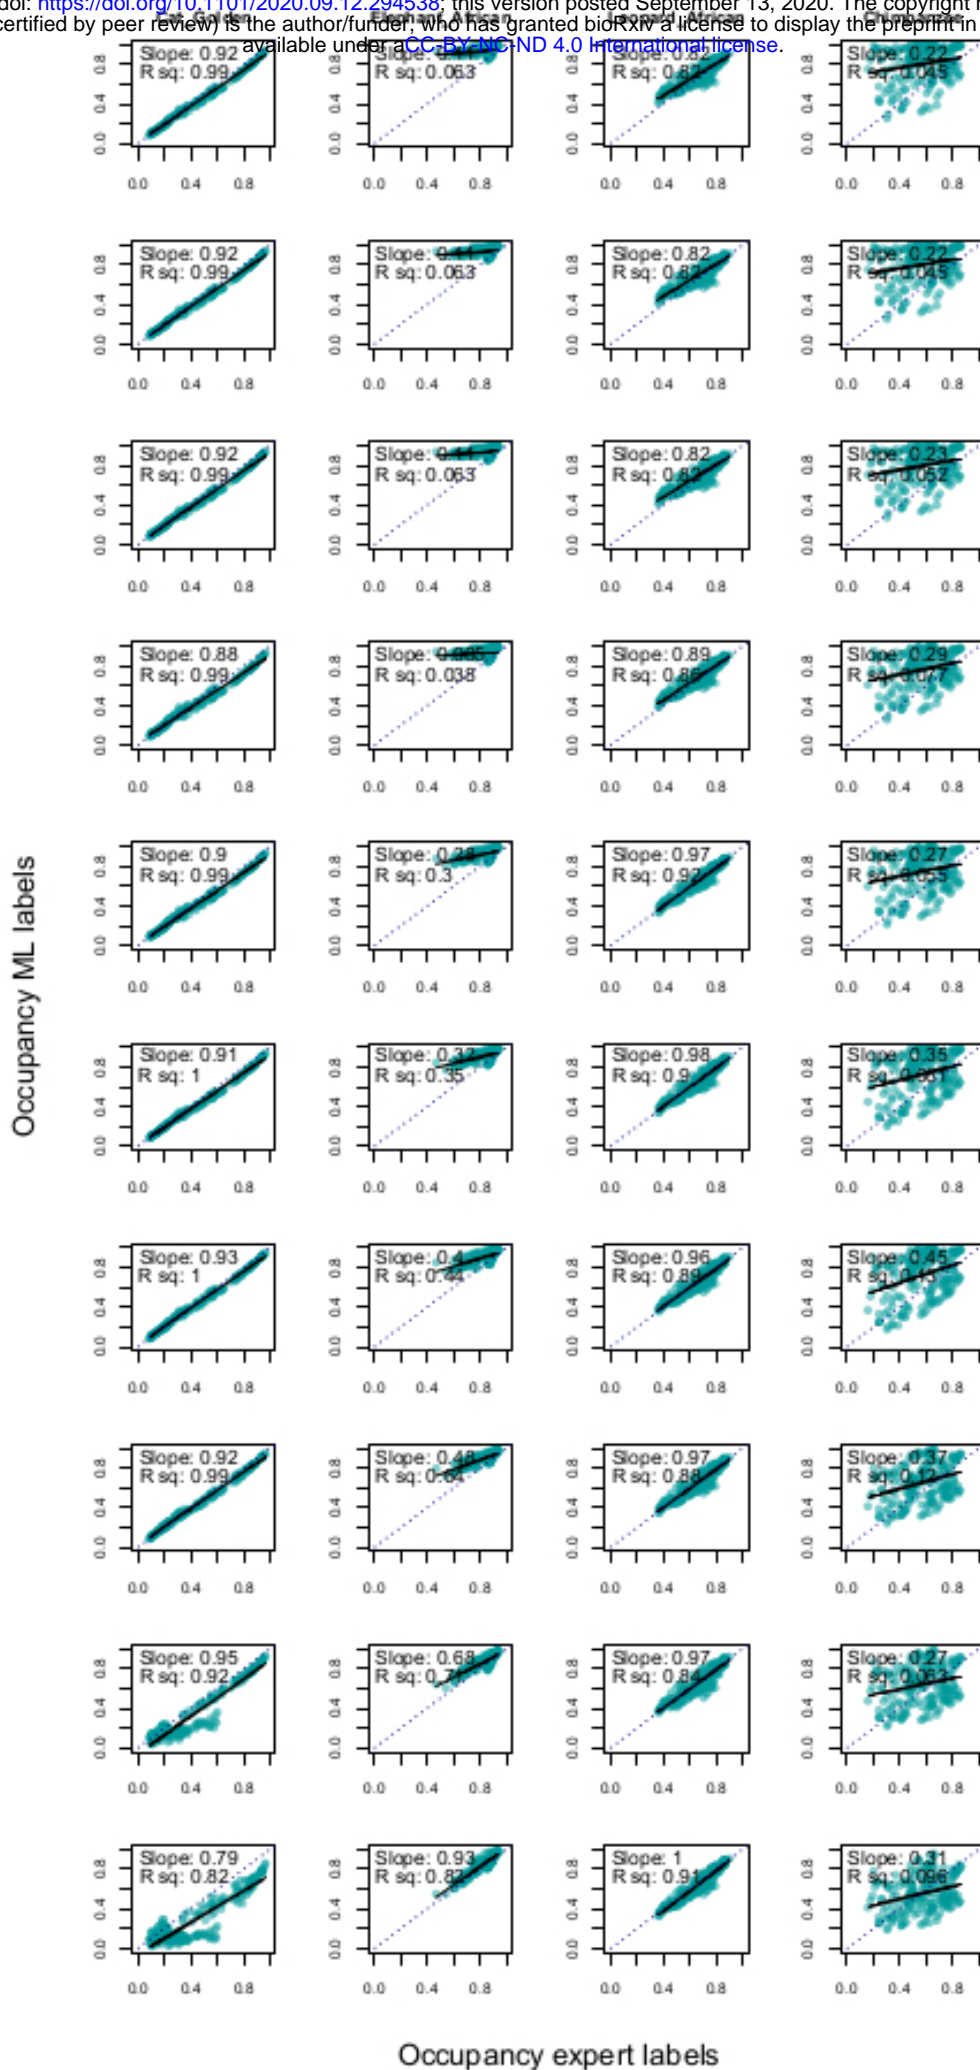

Occupancy expert labels

602 **ABOVE: Figure S8.** Relationship between estimated occupancy probability for  $n = 227$  camera  
603 stations (points) from machine learning (ML) labels (y-axis) and expert labels (x-axis) for the four  
604 focal species at each threshold (row) from 0 to 90%, in 10% intervals.

605

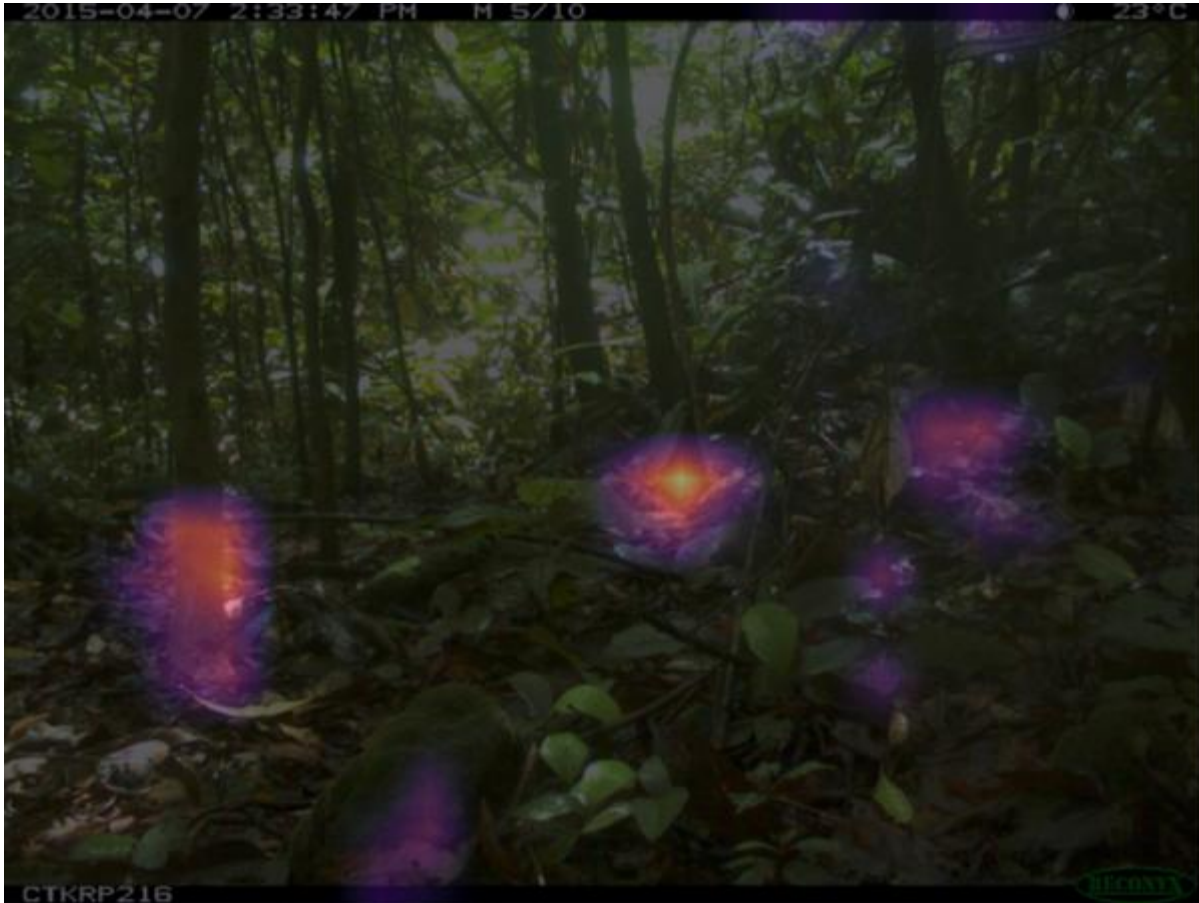

606

607 **Figure S9.** The image from Figure 9 with an added layer illustrating the most important regions of the  
608 image for the model when identifying the nkulengu rail. The brightest spot (yellow) near the center of  
609 the image encompasses a part of the bird's beak and head, which apparently were crucial during identi-  
610 fication. We used the Grad-CAM (1) technique to create this image.

611

## 612 **SI References**

1. R. R. Selvaraju, *et al.*, Grad-CAM: Visual Explanations From Deep Networks via Gradient-Based Localization in (2017), pp. 618–626.

613
